# Supplementary material for: Novel Aminoglycoside Resistance Transposons and Transposon-Derived Circular Forms Detected in Carbapenem-Resistant Acinetobacter baumannii Clinical Isolates
Source: PubMed Central journal article supplement (PMC4776018; doi:10.1128/aac.02143-15), 2016-02-26
Supplement: AAC.02143-15_zac003164959so1.pdf [file AAC.02143-15_zac003164959so1.pdf]

## SUPPLEMENTAL MATERIAL

**TABLE S1.** Primers and PCR assays.

| PCR assay title                                      | PCR assay code (genetic target)                     | Oligo Name          | Oligo features       | 5'-3' sequence         | Expected amplicon size(bp) |
|------------------------------------------------------|-----------------------------------------------------|---------------------|----------------------|------------------------|----------------------------|
| Genetic context of <i>bla</i> <sub>ADC</sub>         | PCR1 (ADC upstream)                                 | foIE/ADC-F          | External, inwards    | GCTGAACGCGATAAACTTCG   | 814 / 1902 / 2003          |
|                                                      |                                                     | ADC-R               | Internal, outwards   | TCGAATCGGCTGATTTTCTT   |                            |
|                                                      | PCR2 (ADC downstream)                               | ADC-F               | Internal, outwards   | CTGGCTCAACTACCGGTTTC   | 2360 / 3551                |
|                                                      |                                                     | ADC/orf-R           | External, inwards    | GCTGTAGGCCAAGGTGAAAG   |                            |
| Genetic context of <i>bla</i> <sub>OXA-51-like</sub> | PCR3 (OXA-51-like upstream)                         | fxsA-F              | External, inwards    | TTTGCAGTGTTCTCATTGC    | 1706 / 2895                |
|                                                      |                                                     | N-Acyltransferase-R | External, inwards    | GGCTTGACGCTGCTTTTTAC   |                            |
| Genetic context of <i>bla</i> <sub>OXA-23</sub>      | PCR4 (Tn2006 downstream)                            | Tn6022-sup-F        | External, inwards    | CCTTGCCCTTTACATTCTCG   | 3309                       |
|                                                      |                                                     | ΔDEAD-R             | Internal, outwards   | ATGGGCTTCGTCATTTCATTG  |                            |
|                                                      | PCR5 (Tn2006 upstream)                              | ΔDEAD-F             | Internal, outwards   | GTGCCGCCTATCAGTTCTCT   | 2688                       |
|                                                      |                                                     | Tn6022-orf4-R       | External, inwards    | GAAAATGCCAAGGGAATAAAAA |                            |
|                                                      | PCR6 (Tn2009 downstream)                            | fimC-F              | External, inwards    | TTTTGTGCTTCAACACGAG    | 1610                       |
|                                                      |                                                     | Tn2009-orf-R        | Internal, outwards   | ATCGCCACGGAAGTATGAAC   |                            |
|                                                      | PCR7 (Tn2009, OXA-23 downstream)                    | Tn2009-T5orf172-F   |                      | CTTTCTTTGGTGAGGCTTGC   | 2484                       |
|                                                      |                                                     | ΔDEAD-R             |                      | ATGGGCTTCGTCATTTCATTG  |                            |
| PCR8 (Tn2009 upstream)                               | ΔDEAD-F                                             | Internal, outwards  | GTGCCGCCTATCAGTTCTCT | 2441                   |                            |
|                                                      | fimA-R                                              | External, inwards   | TCAATGGGTTGACGTAGCTG |                        |                            |
| Genetic context of <i>bla</i> <sub>OXA-24-like</sub> | PCR9 (OXA-72-positive Aci1 plasmid)                 | pAB0057-orf-F       |                      | AATACGATCGGCTTGCTGTT   | 1609                       |
|                                                      |                                                     | pAB0057-repB-R      |                      | GACGCGGAATAAATCCTTA    |                            |
|                                                      | PCR10 (OXA-24-positive Aci1 plasmid)                | pABVA01-orf-F       |                      | ATACGATCTGCCTGCTGCTT   | 1732                       |
|                                                      |                                                     | pABVA01-repB-R      |                      | CTATGGCTGGGGCAAAGATA   |                            |
|                                                      | PCR11 (OXA-24-like downstream)                      | repA-F              | External, inwards    | TACCACACCCAAACGCTACA   | 635                        |
|                                                      |                                                     | oxa-24-R            | Internal, outwards   | CAAAAAGTGGATGGGGAATG   |                            |
|                                                      | PCR12 (OXA-24-like upstream)                        | oxa-24-F            | Internal, outwards   | GCTTTTTTCATGTTGCTGAGAA | 1438 / 2298                |
|                                                      |                                                     | tonB-R              | External, inwards    | CCTGCCCACGAATAATAGGA   |                            |
|                                                      | PCR13 (OXA-72-positive Aci1 plasmid - isolate A100) | pA100-F-1           |                      | CGAGGGCGAAATTTTAATGA   | 445                        |
|                                                      |                                                     | pA100-emrE-R        |                      | ACCATCACGCTTGGAAAAAG   |                            |
|                                                      | PCR14 (OXA-72-positive Aci1 plasmid - isolate A100) | pA100-F-2           |                      | GCTTGCAAAGCAAGTGGATA   | 1011                       |
|                                                      |                                                     | pA100-mobA-R        |                      | GTGGTTTAAGCCGTGTCGAT   |                            |
|                                                      | PCR15 (OXA-72-positive Aci1 plasmid - isolate A100) | pA100-F-1           |                      | CGAGGGCGAAATTTTAATGA   | 3240                       |
|                                                      |                                                     | pAB0057-repB-R      |                      | GACGCGGAATAAATCCTTA    |                            |
|                                                      | For additional sequencing                           | ISAb31-F            |                      | AACGAATAGCCAATCGAACAA  |                            |

**TABLE S1. CONT.** Primers and PCR assays.

| PCR assay title                                   | PCR assay code (genetic target)                                                        | Oligo Name        | Oligo features         | 5'-3' sequence         | Expected amplicon size(bp) |
|---------------------------------------------------|----------------------------------------------------------------------------------------|-------------------|------------------------|------------------------|----------------------------|
| Genetic context of <i>bla</i> <sub>OXA-58</sub>   | PCR16 (OXA-58 downstream)                                                              | hsdS-F            | External, inwards      | CGTGGAGCTACATGTGGTGA   | 2428                       |
|                                                   |                                                                                        | oxa-58-R          | Internal, outwards     | GGGTTGGTATGTGGTTTTG    |                            |
|                                                   | PCR17 (OXA-58 upstream)                                                                | oxa-58-F          | Internal, outwards     | AAAAGCGCTTGAACATTCTGA  | 2242                       |
|                                                   |                                                                                        | cinH-R            | External, inwards      | GGATTTTTGTTGACCGTGCT   |                            |
| For additional sequencing                         | ISAb3-R                                                                                |                   | AGAGGCAGCGGTATACGAGA   |                        |                            |
| Genetic context of <i>aadB1</i>                   | PCR18 (Ab-ST3- <i>aadB1</i> upstream)                                                  | MMPL-F            | External, inwards      | TCTTGGCATCGAACCCCTTCT  | 1332                       |
|                                                   |                                                                                        | TnST3-IS6100-R    | Internal, outwards     | GGCTTTTCCCAGTGCTTCAG   |                            |
|                                                   | PCR19 (Ab-ST3- <i>aadB1</i> downstream)                                                | TnST3-IS6100-F    | Internal, outwards     | AGGGTGATGTGATCCTGTGG   | 1150                       |
|                                                   |                                                                                        | MMPL-R            | External, inwards      | AGGACCCCTTTCACCTACACCG |                            |
|                                                   | PCR20 (Ab-ST3- <i>aadB1</i> circular form)                                             | TnST3-IS6100-F    | Internal, outwards     | AGGGTGATGTGATCCTGTGG   | 1192                       |
|                                                   |                                                                                        | TnST3-IS6100-R    | Internal, outwards     | GGCTTTTCCCAGTGCTTCAG   |                            |
|                                                   | PCR21 (Ab-ST3- <i>aadB1</i> circular form)                                             | TnST3-F           | Internal, outwards     | TCAGAAGACGACTGCACCAG   | 2008                       |
|                                                   |                                                                                        | TnST3-ssb-R       | Internal, outwards     | ATCTTGCCCTGCACGAATAC   |                            |
| PCR22 (Ab-ST3- <i>aadB1</i> insertion site)       | MMPL-F                                                                                 | External, inwards | TCTTGGCATCGAACCCCTTCT  | 1290                   |                            |
|                                                   | MMPL-R                                                                                 | External, inwards | AGGACCCCTTTCACCTACACCG |                        |                            |
| PCR23 ( <i>aadB1</i> -positive plasmid pRAY*-v1)  | mobA-F                                                                                 |                   | GCTGTACTTCGTTCTAGCTCG  | 1228                   |                            |
|                                                   | mobA-R                                                                                 |                   | TGTGATTCCCAATGTTGAGC   |                        |                            |
| Genetic context of <i>armA</i>                    | PCR24 (Tn6279 upstream, linkage between host chromosome and Tn6020b)                   | HPA2-F            | External, inwards      | GCTGCACAGTGGTTTTCTGA   | 1967                       |
|                                                   |                                                                                        | aphA1b-F (R)      | Internal, outwards     | CGACTGAATCCGGTGAGAAT   |                            |
|                                                   | PCR25 (Tn6279 upstream, linkage between host chromosome and Tn6020b)                   | araC-F            | External, inwards      | AATGCCAATGGGGATCATAA   | 1801                       |
|                                                   |                                                                                        | aphA1b-F (R)      | Internal, outwards     | CGACTGAATCCGGTGAGAAT   |                            |
|                                                   | PCR26 (Tn6279 upstream, linkage between host chromosome and Tn1548-like-1)             | HPA2-F            | External, inwards      | GCTGCACAGTGGTTTTCTGA   | 3214                       |
|                                                   |                                                                                        | catB8-R           | Internal, outwards     | GCACCGTCTCCAATTTTGAT   |                            |
|                                                   | PCR27 (Tn6279 upstream, linkage between host chromosome and Tn1548-like-1)             | araC-F            | External, inwards      | AATGCCAATGGGGATCATAA   | 3208                       |
|                                                   |                                                                                        | catB8-R           | Internal, outwards     | GCACCGTCTCCAATTTTGAT   |                            |
|                                                   | PCR28 ( $\Delta$ Tn6279 upstream, linkage between host chromosome and $\Delta$ Tn6279) | sig-pep-F         | External, inwards      | AAAGTGACTCCGGTCTCGAA   | 507                        |
|                                                   | PCR29 (Tn6020b)                                                                        | tnpU-R            | Internal, outwards     | GTGGCATCAATGACCAAGTG   |                            |
|                                                   |                                                                                        | IS26-F            |                        | TGGTACTGGCGTAACCCCTTC  | 1180 / 1349                |
|                                                   | PCR30 (Tn6020b)                                                                        | aphA1b-F (R)      |                        | CGACTGAATCCGGTGAGAAT   |                            |
| aphA1b-R (F)                                      |                                                                                        |                   | GGTTGCATTTCGATTCTGTT   | 931                    |                            |
| PCR31 (linkage between Tn6020b and Tn1548-like-1) | IS26-R1                                                                                |                   | TCTGCCACTTCTCACGTTG    |                        |                            |
|                                                   | aphA1b-R (F)                                                                           |                   | GGTTGCATTTCGATTCTGTT   | 3325                   |                            |
| PCR32 (Tn1548-like-1)                             | catB8-R                                                                                |                   | GCACCGTCTCCAATTTTGAT   |                        |                            |
|                                                   | catB8-F                                                                                |                   | ATGACTGGGCATCATCCTTC   | 3114                   |                            |
|                                                   | CR1-R                                                                                  |                   | GCTTTGAAGGCTGGGTAGTG   |                        |                            |

**TABLE S1. CONT.** Primers and PCR assays.

| PCR assay title                                                                                                                          | PCR assay code (genetic target)                                                           | Oligo Name         | Oligo features        | 5'-3' sequence       | Expected amplicon size(bp) |
|------------------------------------------------------------------------------------------------------------------------------------------|-------------------------------------------------------------------------------------------|--------------------|-----------------------|----------------------|----------------------------|
| Genetic context of <i>armA</i>                                                                                                           | PCR33 (Tn1548-like-1)                                                                     | catB8-F            |                       | ATGACTGGGCATCATCCTTC | 886                        |
|                                                                                                                                          |                                                                                           | aadA1-R            |                       | ACCAAGGCAACGCTATGTTC |                            |
|                                                                                                                                          | PCR34 (Tn1548-like-1)                                                                     | aadA1-F            |                       | TGATTTGCTGGTTACGGTGA | 2522                       |
|                                                                                                                                          |                                                                                           | CR1-R              |                       | GCTTTGAAGGCTGGGTAGTG |                            |
|                                                                                                                                          | PCR35 (Tn1548-like-1)                                                                     | aadA1-F            |                       | TGATTTGCTGGTTACGGTGA | 4462                       |
|                                                                                                                                          |                                                                                           | tnpU-R             |                       | GTGGCATCAATGACCAAGTG |                            |
|                                                                                                                                          | PCR36 (host plasmid, adjacent to Tn1548-like-2, - $\Delta$ 1 and - $\Delta$ 2 )           | CR2-F              |                       | ATCAAAATGCTGCGTTCACA | 1044                       |
|                                                                                                                                          |                                                                                           | sulI2-R            |                       | GATATTCGCGGTTTTCCAGA |                            |
|                                                                                                                                          | PCR37 (host plasmid, adjacent to Tn1548-like-2, - $\Delta$ 1 and - $\Delta$ 2 )           | CR2-F              |                       | ATCAAAATGCTGCGTTCACA | 2338                       |
|                                                                                                                                          |                                                                                           | parA-R             |                       | ATGGGCTCGTAGTCACCATC |                            |
|                                                                                                                                          | PCR38 (linkage between the host plasmid and Tn1548-like-2)                                | Tnsul2-F           |                       | GAATTGCCTTTTGGCGTTTA | 3546                       |
|                                                                                                                                          |                                                                                           | arr2-R             |                       | GCTCCATCAAGGCTGAAAAG |                            |
|                                                                                                                                          | PCR39 (linkage between the host plasmid and Tn1548-like-2- $\Delta$ 1 and - $\Delta$ 2)   | Tnsul2-F           |                       | GAATTGCCTTTTGGCGTTTA | 2543 / 2620                |
|                                                                                                                                          |                                                                                           | gst-R              |                       | AATCGCGGAACAATATCCAG |                            |
|                                                                                                                                          | PCR40 (Tn1548-like-2)                                                                     | cmlA5-F            |                       | CTGCTAGGAAGCATCGGAAC | 3889                       |
|                                                                                                                                          |                                                                                           | PER7-R             |                       | TCAGTAGCGTCGAGGCAGTA |                            |
|                                                                                                                                          | PCR41 (Tn1548-like-2)                                                                     | PER7-F             |                       | AGCTATCATTGCGCAGGTTG | 630                        |
|                                                                                                                                          |                                                                                           | gst-R              |                       | AATCGCGGAACAATATCCAG |                            |
|                                                                                                                                          | PCR42 (Tn1548-like-2, - $\Delta$ 1, and - $\Delta$ 2)                                     | abct-F1            |                       | CAGAATAGGGCGTTTTTCA  | 2338                       |
|                                                                                                                                          |                                                                                           | CR1-R              |                       | GCTTTGAAGGCTGGGTAGTG |                            |
|                                                                                                                                          | PCR43 (Tn1548-like-2, - $\Delta$ 1, and - $\Delta$ 2)                                     | abct-F2            |                       | CTGACCTTGTGGCACTTCAA | 3774                       |
|                                                                                                                                          |                                                                                           | tnpU-R             |                       | GTGGCATCAATGACCAAGTG |                            |
|                                                                                                                                          | PCR44 (Tn1548-like-1, $\Delta$ Tn6279, and Tn1548-like-2, - $\Delta$ 1, and - $\Delta$ 2) | tnpU-F             |                       | TGGAAGAAAGACTCCGGCTA | 790 / 2127                 |
|                                                                                                                                          |                                                                                           | armA-R             |                       | TGTTGCGACTCTTTCATTCG |                            |
|                                                                                                                                          | PCR45 (Tn1548-like-1, $\Delta$ Tn6279, and Tn1548-like-2, - $\Delta$ 1, and - $\Delta$ 2) | tnpD-F             |                       | GTCCTGGTTGGCAAAGGTTA | 1015 / 1843                |
|                                                                                                                                          |                                                                                           | msrE-R             |                       | TTTCCTGCTCCGTTATCACC |                            |
| PCR46 (Tn1548-like-1, $\Delta$ Tn6279, and Tn1548-like-2, - $\Delta$ 1, and - $\Delta$ 2)                                                | pre-orfTn6257-F                                                                           |                    | GCGATGTTCCACGGTTTTAT  | 1929 / 4358          |                            |
|                                                                                                                                          | IS26-R1                                                                                   |                    | TCTGCCACTTCTTCACGTTG  |                      |                            |
| PCR47 (Tn6279 and $\Delta$ Tn6279 downstream, linkage between Tn1548-like-1 and $\Delta$ Tn6279, respectively, with the host chromosome) | repA-F                                                                                    | Internal, outwards | TCCAGTACTACGCCATGCAA  | 1426                 |                            |
|                                                                                                                                          | permease-R                                                                                | External, inwards  | AAGAACGTGCGGGTCTTATG  |                      |                            |
| PCR48 (linkage between Tn1548-like-2, - $\Delta$ 1 and - $\Delta$ 2 and the host plasmid)                                                | repA-F                                                                                    |                    | TCCAGTACTACGCCATGCAA  | 2285                 |                            |
|                                                                                                                                          | res-R                                                                                     |                    | GCGGTCTTGTTGATGCTGTA  |                      |                            |
| PCR49 (host plasmid, adjacent to Tn1548-like-2, - $\Delta$ 1 and - $\Delta$ 2 )                                                          | res-F                                                                                     |                    | GTGCAGATCATGCTTTTTTCG | 2464                 |                            |
|                                                                                                                                          | CR2-R                                                                                     |                    | GGACCGCAGTTGACTCTTTC  |                      |                            |
| PCR50 (Tn6279, circular form)                                                                                                            | repA-F                                                                                    | Internal, outwards | TCCAGTACTACGCCATGCAA  | 1909                 |                            |
|                                                                                                                                          | aphA1b-F (R)                                                                              | Internal, outwards | CGACTGAATCCGGTGAGAAT  |                      |                            |

**TABLE S1. CONT.** Primers and PCR assays.

| PCR assay title                                   | PCR assay code (genetic target)                           | Oligo Name         | Oligo features        | 5'-3' sequence        | Expected amplicon size(bp) |
|---------------------------------------------------|-----------------------------------------------------------|--------------------|-----------------------|-----------------------|----------------------------|
| Genetic context of <i>armA</i>                    | PCR51 (Tn1548-like-1, circular form)                      | repA-F             | Internal, outwards    | TCCAGTACTACGCCATGCAA  | 578 / 1398                 |
|                                                   |                                                           | intI1-R            | Internal, outwards    | GCCTTGATGTTACCCGAGAG  |                            |
|                                                   | PCR52 (Tn1548-like-2, circular form)                      | repA-F             | Internal, outwards    | TCCAGTACTACGCCATGCAA  | 2273                       |
|                                                   |                                                           | arr2-R             | Internal, outwards    | GCTCCATCAAGGCTGAAAAG  |                            |
|                                                   | PCR53 (Tn1548-like-2-Δ1 and -Δ2, circular forms)          | repA-F             | Internal, outwards    | TCCAGTACTACGCCATGCAA  | 1270 / 1347                |
|                                                   |                                                           | gst-R              | Internal, outwards    | AATCGCGGAACAATATCCAG  |                            |
|                                                   | PCR54 (Tn6279, insretion site)                            | HPA2-F             | External, inwards     | GCTGCACAGTGGTTTTCTGA  | 655 / 1484                 |
|                                                   |                                                           | permease-R         | External, inwards     | AAGAACGTGCGGGTCTTATG  |                            |
| PCR55 (Tn6279, insretion site)                    | araC-F                                                    | External, inwards  | AATGCCAATGGGGATCATAA  | Negative              |                            |
|                                                   | permease-R                                                | External, inwards  | AAGAACGTGCGGGTCTTATG  |                       |                            |
| Genetic context of <i>aphA1</i>                   | PCR58 (AbGR-12-like upstream)                             | AB57_1175-F        | External, inwards     | AGGAGATCTTCTTGGCAGTCA | 2254                       |
|                                                   |                                                           | TEM-D1-R           | Internal, outwards    | TTGCCGGGAAGCTAGAGTAA  |                            |
|                                                   | PCR59 (linkage between TEM-D1 and Tn1000)                 | TEM-D1-F           |                       | GCGGCCAACTTACTTCTGAC  | 3238                       |
|                                                   |                                                           | Tn1000-R           |                       | CGGTGTGACAAAACGCATAC  |                            |
|                                                   | PCR60 (linkage between Tn1000 and <i>aphA1</i> )          | Tn1000-F           |                       | GCATAATATTCCCGCGCTTA  | 3416 / 3437 / 3612         |
|                                                   |                                                           | aphA1b-R           |                       | GGTTGCATTTCGATTCTGTT  |                            |
|                                                   | PCR61 ( <i>aphA1</i> downstream)                          | IS26-F             |                       | TGGTACTGGCGTAACCCCTTC | 1368 / 1543                |
|                                                   |                                                           | aphA1b-R           |                       | GGTTGCATTTCGATTCTGTT  |                            |
|                                                   | PCR62 ( <i>aphA1</i> upstream)                            | aphA1b-F           |                       | CGACTGAATCCGGTGAGAAT  | 1100                       |
|                                                   |                                                           | IS26-R1            |                       | TCTGCCACTTCTTCACGTTG  |                            |
|                                                   | PCR63 (linkage between <i>aphA1</i> and class 1 integron) | aphA1b-F           |                       | CGACTGAATCCGGTGAGAAT  | 5134 / 5323 / 5781         |
|                                                   |                                                           | aadA1-R            |                       | ACCAAGGCAACGCTATGTTC  |                            |
|                                                   | PCR64 (linkage between IS26 and class 1 integron)         | IS26-F             |                       | TGGTACTGGCGTAACCCCTTC | 3319 / 4236 / 4425 / 4883  |
|                                                   |                                                           | aadA1-R            |                       | ACCAAGGCAACGCTATGTTC  |                            |
|                                                   | PCR65 (class 1 integron)                                  | intI1-F            |                       | TGCGTGTAAATCATCGTCGT  | 3056 / 3594 / 3695         |
|                                                   |                                                           | aadA1-R            |                       | ACCAAGGCAACGCTATGTTC  |                            |
|                                                   | PCR66 (class 1 integron)                                  | aadA1-F            |                       | TGATTTGCTGGTTACGGTGA  | 2297                       |
|                                                   |                                                           | orf5-F (R)         |                       | TAGGAGCTCGGATCTCAGGA  |                            |
|                                                   | PCR67 (linkage between IS26 and class 1 integron)         | IS26-F             |                       | TGGTACTGGCGTAACCCCTTC | 3776                       |
|                                                   |                                                           | aadA1-F (R)        |                       | TGATTTGCTGGTTACGGTGA  |                            |
| PCR68 (linkage between class 1 integron and IS26) | aadA1-R (F)                                               |                    | ACCAAGGCAACGCTATGTTC  | 3725 / 4371           |                            |
|                                                   | Tn21-R                                                    |                    | ATATACCCAATGCGCTGTCC  |                       |                            |
| PCR69 (AbGR-12-like upstream)                     | AB57_1175-F                                               | External, inwards  | AGGAGATCTTCTTGGCAGTCA | 4921                  |                            |
|                                                   | Tn21-R                                                    | Internal, outwards | ATATACCCAATGCGCTGTCC  |                       |                            |
| PCR70 (AbGR-12-like downstream)                   | Tn21-F                                                    | Internal, outwards | TACCGTGGCAGGAAGAAATC  | 2108                  |                            |
|                                                   | AB57_1209-R                                               | External, inwards  | CATCTGCCATCCAGTTTGTG  |                       |                            |

**TABLE S1. CONT.** Primers and PCR assays.

| PCR assay title                 | PCR assay code (genetic target)        | Oligo Name                | Oligo features     | 5'-3' sequence          | Expected amplicon size(bp)       |
|---------------------------------|----------------------------------------|---------------------------|--------------------|-------------------------|----------------------------------|
| Genetic context of <i>aphA1</i> | PCR71 ( <i>Tn6020</i> , circular form) | aphA1b-circular-F         | Internal, outwards | TGCATCATCAGGAGTACGGA    | 1620 / 1780 / 1947 / 1968 / 2143 |
|                                 |                                        | aphA1b-R                  | Internal, outwards | GGTTGCATTTCGATTCTGT     |                                  |
| Genetic context of <i>aphA6</i> | PCR72 ( <i>TnaphA6</i> downstream)     | aci6-plasmid-ST636-F      | External, inwards  | ACGGTTCACGAACTTTGACA    | 1471                             |
|                                 |                                        | aphA6-R                   | Internal, outwards | TCGTGCTGGATTAGCAGATG    |                                  |
|                                 | PCR73 ( <i>TnaphA6</i> upstream)       | aphA6-F                   | Internal, outwards | GATGGCGACTGACCAATTTT    | 1484                             |
|                                 |                                        | aci6-plasmid-ST636-R      | External, inwards  | CCTTAAGCTTTTCAGCTCATCAA |                                  |
|                                 | PCR74 ( <i>TnaphA6</i> downstream)     | aci6-plasmid-ST25-F       | External, inwards  | TGAACAATGATACCTCGAAAGTT | 1537 / 1792                      |
|                                 |                                        | aphA6-R                   | Internal, outwards | TCGTGCTGGATTAGCAGATG    |                                  |
|                                 | PCR75 ( <i>TnaphA6</i> upstream)       | aphA6-F                   | Internal, outwards | GATGGCGACTGACCAATTTT    | 1633                             |
|                                 |                                        | aci6-plasmid-ST25-R1      | External, inwards  | CTTGAGGAAGGGATGGTTGA    |                                  |
|                                 | PCR76 ( <i>TnaphA6</i> upstream)       | aphA6-F                   | Internal, outwards | GATGGCGACTGACCAATTTT    | 1490 / 2655 / 3745               |
|                                 |                                        | aci6-plasmid-ST25-R2      | External, inwards  | GCCTTTAAAGCAAAAACAAAGC  |                                  |
|                                 | PCR77 ( <i>Aci6</i> plasmid)           | aci6-plasmid-ST636-int-F1 |                    | TTTGCAATTATGGGCTCCAC    | 1044                             |
|                                 |                                        | aci6-plasmid-ST636-int-R1 |                    | TACCCGACTCTTCAGGTGCT    |                                  |
|                                 | PCR78 ( <i>Aci6</i> plasmid)           | aci6-plasmid-ST636-int-F2 |                    | TTGCTTTAATCGGTGGTTCC    | 493                              |
|                                 |                                        | aci6-plasmid-ST636-int-R2 |                    | TTATAGGCTGCACCGACACA    |                                  |
|                                 | PCR79 ( <i>TnaphA6</i> circular form)  | aphA6-F                   | Internal, outwards | GATGGCGACTGACCAATTTT    | 1442 / 1697                      |
|                                 |                                        | aphA6-R                   | Internal, outwards | TCGTGCTGGATTAGCAGATG    |                                  |
|                                 | PCR80 ( <i>TnaphA6</i> insretion site) | aci6-plasmid-ST636-F      | External, inwards  | ACGGTTCACGAACTTTGACA    | 423 / 1513 / 3498                |
|                                 |                                        | aci6-plasmid-ST636-R      | External, inwards  | CCTTAAGCTTTTCAGCTCATCAA |                                  |
|                                 | PCR81 ( <i>TnaphA6</i> insertion site) | aci6-plasmid-ST25-F       | External, inwards  | TGAACAATGATACCTCGAAAGTT | 1728 / 3713                      |
|                                 |                                        | aci6-plasmid-ST25-R1      | External, inwards  | CTTGAGGAAGGGATGGTTGA    |                                  |
|                                 | PCR82 ( <i>TnaphA6</i> insertion site) | aci6-plasmid-ST25-F       | External, inwards  | TGAACAATGATACCTCGAAAGTT | 1840 / 3825                      |
|                                 |                                        | aci6-plasmid-ST25-R2      | External, inwards  | GCCTTTAAAGCAAAAACAAAGC  |                                  |

**TABLE S2.** Quinolone, streptomycin, macrolide, and phenicol resistance features.

| Isolate | <u>Quinolone resistance</u><br><u>chromosomal mutations</u> |      | <u>Streptomycin</u><br><u>resistance genes</u> | <u>Macrolide</u><br><u>resistance genes</u> | <u>Phenicol</u><br><u>resistance genes</u> |              |              |             |
|---------|-------------------------------------------------------------|------|------------------------------------------------|---------------------------------------------|--------------------------------------------|--------------|--------------|-------------|
|         | GyrA                                                        | ParC | <i>strA</i> , <i>strB</i>                      | <i>msr(E)</i> , <i>mph(E)</i>               | <i>cmlA7</i>                               | <i>catA1</i> | <i>catB8</i> | <i>floR</i> |
| A068    | S83L                                                        | S80L | <i>strA</i> , <i>strB</i>                      | <i>msr(E)</i> , <i>mph(E)</i>               | <i>cmlA7</i>                               | –            | –            | –           |
| A069    | S83L                                                        | S80L | <i>strA</i> , <i>strB</i>                      | <i>msr(E)</i> , <i>mph(E)</i>               | –                                          | –            | –            | –           |
| A070    | S83L                                                        | S80L | <i>strA</i> , <i>strB</i>                      | <i>msr(E)</i> , <i>mph(E)</i>               | –                                          | –            | <i>catB8</i> | –           |
| A071    | S83L                                                        | S80L | <i>strA</i> , <i>strB</i>                      | <i>msr(E)</i> , <i>mph(E)</i>               | –                                          | –            | <i>catB8</i> | –           |
| A072    | S83L                                                        | S80L | <i>strA</i> , <i>strB</i>                      | <i>msr(E)</i> , <i>mph(E)</i>               | –                                          | –            | –            | –           |
| A074    | S83L                                                        | S80L | –                                              | –                                           | –                                          | <i>catA1</i> | –            | –           |
| A076    | S83L                                                        | S80L | –                                              | –                                           | –                                          | <i>catA1</i> | –            | –           |
| A077    | S83L                                                        | S80L | <i>strA</i> , <i>strB</i>                      | –                                           | –                                          | –            | –            | –           |
| A078    | S83L                                                        | S80L | <i>strA</i> , <i>strB</i>                      | –                                           | –                                          | –            | –            | –           |
| A079    | S83L                                                        | S80L | <i>strA</i> , <i>strB</i>                      | <i>msr(E)</i> , <i>mph(E)</i>               | –                                          | –            | –            | –           |
| A080    | S83L                                                        | S80L | <i>strA</i> , <i>strB</i>                      | <i>msr(E)</i> , <i>mph(E)</i>               | –                                          | –            | –            | –           |
| A082    | S83L                                                        | S80L | –                                              | –                                           | –                                          | <i>catA1</i> | –            | <i>floR</i> |
| A084    | S83L                                                        | S80L | <i>strA</i> , <i>strB</i>                      | –                                           | –                                          | –            | –            | –           |
| A085    | S83L                                                        | S80L | –                                              | –                                           | –                                          | –            | –            | –           |
| A086    | S83L                                                        | S80L | <i>strA</i> , <i>strB</i>                      | <i>msr(E)</i> , <i>mph(E)</i>               | –                                          | –            | –            | –           |
| A087    | S83L                                                        | S80L | <i>strA</i> , <i>strB</i>                      | –                                           | –                                          | –            | –            | –           |
| A089    | S83L                                                        | S80L | –                                              | <i>msr(E)</i> , <i>mph(E)</i>               | –                                          | –            | –            | –           |
| A091    | S83L                                                        | S80L | <i>strA</i> , <i>strB</i>                      | <i>msr(E)</i> , <i>mph(E)</i>               | –                                          | –            | <i>catB8</i> | –           |
| A092    | S83L                                                        | S80L | <i>strA</i> , <i>strB</i>                      | <i>msr(E)</i> , <i>mph(E)</i>               | <i>cmlA7</i>                               | –            | –            | –           |
| A093    | S83L                                                        | S80L | <i>strA</i> , <i>strB</i>                      | <i>msr(E)</i> , <i>mph(E)</i>               | <i>cmlA7</i>                               | –            | –            | –           |
| A094    | S83L                                                        | S80L | <i>strA</i> , <i>strB</i>                      | <i>msr(E)</i> , <i>mph(E)</i>               | –                                          | –            | –            | –           |
| A095    | S83L                                                        | S80L | <i>strA</i> , <i>strB</i>                      | <i>msr(E)</i> , <i>mph(E)</i>               | –                                          | –            | –            | –           |
| A096    | S83L                                                        | S80L | <i>strA</i> , <i>strB</i>                      | <i>msr(E)</i> , <i>mph(E)</i>               | <i>cmlA7</i>                               | –            | –            | –           |
| A097    | S83L                                                        | S80L | <i>strA</i> , <i>strB</i>                      | <i>msr(E)</i> , <i>mph(E)</i>               | <i>cmlA7</i>                               | –            | –            | –           |
| A099    | S83L                                                        | S80L | –                                              | <i>msr(E)</i> , <i>mph(E)</i>               | –                                          | <i>catA1</i> | –            | –           |
| A100    | S83L                                                        | S80L | –                                              | –                                           | –                                          | <i>catA1</i> | –            | –           |
| A101    | S83L                                                        | S80L | <i>strA</i> , <i>strB</i>                      | –                                           | –                                          | –            | –            | –           |
| A105    | S83L                                                        | S80L | –                                              | –                                           | –                                          | <i>catA1</i> | –            | –           |

**TABLE S3.** Rifampicin, sulphonamide, and tetracycline resistance features.

| Isolate | <u>Rifampicin</u>       | <u>Sulphonamide</u>     |                         | <u>Tetracycline</u>              |                         |                         |
|---------|-------------------------|-------------------------|-------------------------|----------------------------------|-------------------------|-------------------------|
|         | <u>resistance genes</u> | <u>resistance genes</u> | <u>resistance genes</u> | <u>resistance genes</u>          | <u>resistance genes</u> | <u>resistance genes</u> |
|         | <i>arr-2</i>            | <i>sul1</i>             | <i>sul2</i>             | <i>tet(A)</i>                    | <i>tet(B)</i>           | <i>tet(39)</i>          |
| A068    | <i>arr-2</i>            | <i>sul1</i> (2 copies)  | <i>sul2</i> (2 copies)  | –                                | <i>tet(B)</i>           | –                       |
| A069    | –                       | <i>sul1</i>             | <i>sul2</i> (2 copies)  | –                                | <i>tet(B)</i>           | –                       |
| A070    | –                       | <i>sul1</i> (2 copies)  | <i>sul2</i>             | –                                | $\Delta$ <i>tet(B)</i>  | –                       |
| A071    | –                       | <i>sul1</i>             | <i>sul2</i>             | –                                | $\Delta$ <i>tet(B)</i>  | –                       |
| A072    | –                       | –                       | <i>sul2</i>             | –                                | $\Delta$ <i>tet(B)</i>  | –                       |
| A074    | –                       | <i>sul1</i> (2 copies)  | –                       | –                                | –                       | –                       |
| A076    | –                       | <i>sul1</i> (2 copies)  | –                       | <i>tet(A)</i>                    | –                       | –                       |
| A077    | –                       | –                       | –                       | –                                | $\Delta$ <i>tet(B)</i>  | –                       |
| A078    | –                       | –                       | –                       | –                                | –                       | <i>tet(39)</i>          |
| A079    | –                       | –                       | –                       | –                                | $\Delta$ <i>tet(B)</i>  | –                       |
| A080    | –                       | –                       | –                       | –                                | $\Delta$ <i>tet(B)</i>  | –                       |
| A082    | –                       | <i>sul1</i> (2 copies)  | –                       | <i>tet(A)</i>                    | –                       | –                       |
| A084    | –                       | <i>sul1</i>             | <i>sul2</i>             | –                                | $\Delta$ <i>tet(B)</i>  | –                       |
| A085    | –                       | <i>sul1</i>             | –                       | <i>tet(A)</i> <sub>OIFC137</sub> | –                       | –                       |
| A086    | –                       | –                       | <i>sul2</i>             | –                                | $\Delta$ <i>tet(B)</i>  | –                       |
| A087    | –                       | –                       | –                       | –                                | $\Delta$ <i>tet(B)</i>  | –                       |
| A089    | –                       | –                       | <i>sul2</i>             | –                                | –                       | –                       |
| A091    | –                       | <i>sul1</i>             | –                       | –                                | $\Delta$ <i>tet(B)</i>  | –                       |
| A092    | <i>arr-2</i>            | <i>sul1</i> (2 copies)  | <i>sul2</i> (2 copies)  | –                                | <i>tet(B)</i>           | –                       |
| A093    | <i>arr-2</i>            | <i>sul1</i> (2 copies)  | <i>sul2</i> (2 copies)  | –                                | <i>tet(B)</i>           | –                       |
| A094    | –                       | <i>sul1</i>             | <i>sul2</i> (2 copies)  | –                                | <i>tet(B)</i>           | –                       |
| A095    | –                       | –                       | <i>sul2</i>             | –                                | $\Delta$ <i>tet(B)</i>  | –                       |
| A096    | <i>arr-2</i>            | <i>sul1</i> (2 copies)  | <i>sul2</i> (2 copies)  | –                                | <i>tet(B)</i>           | –                       |
| A097    | <i>arr-2</i>            | <i>sul1</i> (2 copies)  | <i>sul2</i> (2 copies)  | –                                | <i>tet(B)</i>           | –                       |
| A099    | –                       | <i>sul1</i> (2 copies)  | –                       | <i>tet(A)</i>                    | –                       | –                       |
| A100    | –                       | <i>sul1</i> (2 copies)  | –                       | <i>tet(A)</i>                    | –                       | –                       |
| A101    | –                       | –                       | –                       | –                                | $\Delta$ <i>tet(B)</i>  | –                       |
| A105    | –                       | <i>sul1</i> (2 copies)  | –                       | –                                | –                       | –                       |

**TABLE S4.** Plasmid replicon types carried by the isolates, and the BioProject and BioSample accession numbers.

| Isolate | Plasmid replicon types <sup>a</sup> |      |      |      |      |      |       | BioProject accession number | BioSample accession number |
|---------|-------------------------------------|------|------|------|------|------|-------|-----------------------------|----------------------------|
|         | GR1                                 | GR2  | GR6  | GR7  | GR8  | GR10 | GR14  |                             |                            |
| A068    | –                                   | Aci1 | –    | –    | –    | –    | –     | PRJNA282589                 | SAMN03571960               |
| A069    | –                                   | –    | –    | –    | –    | –    | –     | PRJNA282600                 | SAMN03575971               |
| A070    | –                                   | –    | Aci6 | –    | Aci9 | –    | –     | PRJNA282601                 | SAMN03575972               |
| A071    | –                                   | –    | –    | –    | –    | –    | –     | PRJNA282602                 | SAMN03575974               |
| A072    | –                                   | Aci1 | Aci6 | –    | –    | –    | –     | PRJNA282603                 | SAMN03576356               |
| A074    | –                                   | Aci1 | Aci6 | –    | –    | –    | –     | PRJNA282604                 | SAMN03576358               |
| A076    | –                                   | Aci1 | –    | –    | –    | –    | p4AYE | PRJNA282605                 | SAMN03576359               |
| A077    | –                                   | Aci1 | –    | –    | –    | –    | –     | PRJNA282606                 | SAMN03576361               |
| A078    | –                                   | Aci1 | –    | –    | –    | –    | –     | PRJNA282607                 | SAMN03576362               |
| A079    | –                                   | Aci1 | –    | –    | –    | –    | –     | PRJNA282608                 | SAMN03576363               |
| A080    | –                                   | Aci1 | –    | –    | –    | –    | –     | PRJNA282609                 | SAMN03576364               |
| A082    | –                                   | Aci1 | Aci6 | –    | –    | –    | –     | PRJNA282610                 | SAMN03576365               |
| A084    | –                                   | Aci1 | Aci6 | –    | –    | –    | –     | PRJNA282611                 | SAMN03576366               |
| A085    | –                                   | –    | –    | –    | –    | –    | –     | PRJNA282613                 | SAMN03576441               |
| A086    | p1S1                                | Aci1 | –    | –    | –    | –    | –     | PRJNA282614                 | SAMN03576442               |
| A087    | –                                   | Aci1 | –    | –    | –    | –    | –     | PRJNA282615                 | SAMN03576445               |
| A089    | –                                   | Aci1 | –    | –    | –    | –    | –     | PRJNA282616                 | SAMN03576446               |
| A091    | –                                   | Aci1 | Aci6 | –    | –    | –    | –     | PRJNA282617                 | SAMN03576448               |
| A092    | –                                   | Aci1 | Aci6 | –    | –    | –    | –     | PRJNA282618                 | SAMN03576449               |
| A093    | –                                   | Aci1 | –    | –    | –    | –    | –     | PRJNA282619                 | SAMN03576505               |
| A094    | –                                   | Aci1 | Aci6 | –    | –    | –    | –     | PRJNA282620                 | SAMN03576511               |
| A095    | –                                   | Aci1 | Aci6 | –    | –    | –    | –     | PRJNA282622                 | SAMN03576512               |
| A096    | –                                   | Aci1 | Aci6 | –    | –    | –    | –     | PRJNA282623                 | SAMN03577725               |
| A097    | –                                   | Aci1 | Aci6 | –    | –    | –    | –     | PRJNA282626                 | SAMN03577726               |
| A099    | –                                   | –    | Aci6 | –    | –    | AciX | –     | PRJNA282627                 | SAMN03577727               |
| A100    | –                                   | Aci1 | –    | p3S2 | –    | –    | p4AYE | PRJNA282628                 | SAMN03577728               |
| A101    | –                                   | Aci1 | Aci6 | –    | –    | –    | –     | PRJNA282640                 | SAMN03577729               |
| A105    | –                                   | Aci1 | Aci6 | –    | –    | –    | –     | PRJNA282641                 | SAMN03577730               |

<sup>a</sup> According to the method described by Bertini A, Poirel L, Mugnier PD, Villa L, Nordmann P, Carattoli A. 2010. Characterization and PCR-based replicon typing of resistance plasmids in *Acinetobacter baumannii*. Antimicrob Agents Chemother 54:4168–4177.



**TABLE S5.** Genetic structure and epidemiological data of plasmids carrying the *bla*<sub>OXA-24</sub> or *bla*<sub>OXA-72</sub> genes.

| Plasmid     | Comments                              | Size (bp) | Genetic structure                                                                                                                                                                                                                                                                                                                                                                                                                                                                                      | GenBank accession number | Reference <sup>a</sup>       |
|-------------|---------------------------------------|-----------|--------------------------------------------------------------------------------------------------------------------------------------------------------------------------------------------------------------------------------------------------------------------------------------------------------------------------------------------------------------------------------------------------------------------------------------------------------------------------------------------------------|--------------------------|------------------------------|
| pABVA01     | 2000 / Varese, Italy / Int Clone II   | 8963      | 4 iterons, <i>repB</i> <sub>pABVA01</sub> , <i>repA</i> <sub>pABVA01</sub> , XerC/XerD-like sequence 1, <i>bla</i> <sub>OXA-24</sub> , XerC/XerD-like sequence 2, <i>abkA</i> , <i>abkB</i> , <i>tonB</i> , <i>orf</i> <sub>Septicolysin</sub> , XerC/XerD-like sequence 3, <i>fliD</i> , <i>orf1</i> , <i>orf2</i> (189 bp)                                                                                                                                                                           | FM210331                 | DAndrea <i>et al.</i> , 2009 |
| pMMCU3      | Spain                                 | 8964      | 4 iterons, <i>repB</i> <sub>pABVA01</sub> , <i>repA</i> <sub>pABVA01</sub> , XerC/XerD-like sequence 1, <i>bla</i> <sub>OXA-24</sub> , XerC/XerD-like sequence 2, <i>abkA</i> , <i>abkB</i> , <i>tonB</i> , <i>orf</i> <sub>Septicolysin</sub> , XerC/XerD-like sequence 3, <i>fliD</i> , <i>orf1</i> , <i>orf2</i> (189 bp)                                                                                                                                                                           | GQ904227                 | Merino <i>et al.</i> , 2010  |
| pA077       | 2013 / Skåne, Sweden / ST2            | 8963      | 4 iterons, <i>repB</i> <sub>pABVA01</sub> , <i>repA</i> <sub>pABVA01</sub> , XerC/XerD-like sequence 1, <i>bla</i> <sub>OXA-24</sub> , XerC/XerD-like sequence 2, <i>abkA</i> , <i>abkB</i> , <i>tonB</i> , <i>orf</i> <sub>Septicolysin</sub> , XerC/XerD-like sequence 3, <i>fliD</i> , <i>orf1</i> , <i>orf2</i> (189 bp)                                                                                                                                                                           | This study               | This study                   |
| pA087       | 2013 / Våstra Götaland, Sweden / ST2  | 8963      | 4 iterons, <i>repB</i> <sub>pABVA01</sub> , <i>repA</i> <sub>pABVA01</sub> , XerC/XerD-like sequence 1, <i>bla</i> <sub>OXA-24</sub> , XerC/XerD-like sequence 2, <i>abkA</i> , <i>abkB</i> , <i>tonB</i> , <i>orf</i> <sub>Septicolysin</sub> , XerC/XerD-like sequence 3, <i>fliD</i> , <i>orf1</i> , <i>orf2</i> (189 bp)                                                                                                                                                                           | This study               | This study                   |
| pAB-NCGM253 | 2012 / Japan                          | 8970      | 4 iterons, <i>repB</i> <sub>pAB0057</sub> , <i>repA</i> <sub>pAB0057</sub> , XerC/XerD-like sequence 1, <i>bla</i> <sub>OXA-72</sub> , XerC/XerD-like sequence 2, <i>abkA</i> , <i>abkB</i> , <i>tonB</i> , <i>orf</i> <sub>Septicolysin</sub> , XerC/XerD-like sequence 3, <i>fliD</i> , <i>orf1</i> , <i>orf2</i> (339 bp)                                                                                                                                                                           | AB823544                 | Tada <i>et al.</i> , 2014    |
| pA074       | 2012 / Skåne, Sweden / ST636          | 9831      | 4 iterons, <i>repB</i> <sub>pAB0057</sub> , <i>repA</i> <sub>pAB0057</sub> , XerC/XerD-like sequence 1, <i>bla</i> <sub>OXA-72</sub> , <i>ISAb31</i> , XerC/XerD-like sequence 2, <i>abkA</i> , <i>abkB</i> , <i>tonB</i> , <i>orf</i> <sub>Septicolysin</sub> , XerC/XerD-like sequence 3, <i>fliD</i> , <i>orf1</i> , <i>orf2</i> (339 bp)                                                                                                                                                           | This study               | This study                   |
| pA078       | 2013 / Våstra Götaland, Sweden / ST23 | 9831      | 4 iterons, <i>repB</i> <sub>pAB0057</sub> , <i>repA</i> <sub>pAB0057</sub> , XerC/XerD-like sequence 1, <i>bla</i> <sub>OXA-72</sub> , <i>ISAb31</i> , XerC/XerD-like sequence 2, <i>abkA</i> , <i>abkB</i> , <i>tonB</i> , <i>orf</i> <sub>Septicolysin</sub> , XerC/XerD-like sequence 3, <i>fliD</i> , <i>orf1</i> , <i>orf2</i> (339 bp)                                                                                                                                                           | This study               | This study                   |
| pA100       | 2013 / Skåne, Sweden / ST1            | 15166     | 4 iterons, <i>repB</i> <sub>pAB0057</sub> , <i>repA</i> <sub>pAB0057</sub> , XerC/XerD-like sequence 1, <i>bla</i> <sub>OXA-72</sub> , <i>ISAb31</i> , XerC/XerD-like sequence 2, <i>abkA</i> , <i>abkB</i> , <i>tonB</i> , <i>orf</i> <sub>Septicolysin</sub> , XerC/XerD-like sequence 3, <i>orf</i> , <i>mobA</i> , <i>rep3</i> , XerC/XerD-like sequence 4, <i>emrE</i> , <i>orf</i> <sub>Plasmid mobilization</sub> , XerC/XerD-like sequence 5, <i>fliD</i> , <i>orf1</i> , <i>orf2</i> (339 bp) | This study               | This study                   |
| pA105       | 2013 / Stockholm, Sweden / ST636      | 9830      | 4 iterons, <i>repB</i> <sub>pAB0057</sub> , <i>repA</i> <sub>pAB0057</sub> , XerC/XerD-like sequence 1, <i>bla</i> <sub>OXA-72</sub> , <i>ISAb31</i> , XerC/XerD-like sequence 2, <i>abkA</i> , <i>abkB</i> , <i>tonB</i> , <i>orf</i> <sub>Septicolysin</sub> , XerC/XerD-like sequence 3, <i>fliD</i> , <i>orf1</i> , <i>orf2</i> (339 bp)                                                                                                                                                           | This study               | This study                   |

<sup>a</sup> D'Andrea MM, Giani T, D'Arezzo S, Capone A, Petrosillo N, Visca P, Luzzaro F, Rossolini GM. 2009. Characterization of pABVA01, a plasmid encoding the OXA-24 carbapenemase from Italian isolates of *Acinetobacter baumannii*. *Antimicrob Agents Chemother* **53**:3528–3533.  
Merino M, Acosta J, Poza M, Sanz F, Beceiro A, Chaves F, Bou G. 2010. OXA-24 carbapenemase gene flanked by XerC/XerD-like recombination sites in different plasmids from different *Acinetobacter* species isolated during a nosocomial outbreak. *Antimicrob Agents Chemother* **54**:2724–2727.  
Tada T, Miyoshi-Akiyama T, Shimada K, Shimojima M, Kirikae T. 2014. Dissemination of 16S rRNA methylase ArmA-producing *Acinetobacter baumannii* and emergence of OXA-72 carbapenemase coproducers in Japan. *Antimicrob Agents Chemother* **58**:2916–2920.

**TABLE S6.** Numeration of the GenBank variants of *bla*<sub>ADC</sub>.

| Variant <sup>a</sup> | GenBank accession number |                    | Species of first identification | NCBI reference sequence, length <sup>b</sup> | Reference <sup>c</sup>                                                 | Previous designations |
|----------------------|--------------------------|--------------------|---------------------------------|----------------------------------------------|------------------------------------------------------------------------|-----------------------|
|                      | Protein                  | Nucleotide         |                                 |                                              |                                                                        |                       |
| ADC-1                | CAB77444                 | AJ009979           | <i>Acinetobacter baumannii</i>  | WP_004714775                                 | Bou & Martinez-Beltran, 2000                                           | ADC-NIPH 1362         |
| ADC-2                | AAO43172                 | AY177427           | <i>Oligella urethralis</i>      | WP_004746565                                 | Mammeri <i>et al.</i> , 2003                                           | ADC-NIPH 1734         |
| ADC-3                | AAO59456                 | AY178995           | <i>A. baumannii</i>             | –                                            | Mammeri <i>et al.</i> , 2003                                           | –                     |
| ADC-4                | AAO59457                 | AY178996           | <i>A. baumannii</i>             | –                                            | Mammeri <i>et al.</i> , 2003                                           | –                     |
| ADC-5                | CAE00827                 | AJ575184           | <i>Acinetobacter pittii</i>     | WP_038405930                                 | Beceiro <i>et al.</i> , 2004                                           | –                     |
| ADC-6                | AAR13676                 | AY325306           | <i>A. baumannii</i>             | WP_017725267                                 | Segal <i>et al.</i> , 2004                                             | –                     |
| ADC-7                | AAT70411                 | AY648950           | <i>A. baumannii</i>             | –                                            | Hujer <i>et al.</i> , 2005                                             | –                     |
| ADC-10               | ABI18382                 | DQ883640           | <i>A. baumannii</i>             | –                                            | Hujer <i>et al.</i> , not published                                    | –                     |
| ADC-11               | ADG46039                 | GU591983; CU459141 | <i>A. baumannii</i>             | WP_001211205                                 | Rodriguez-Martinez <i>et al.</i> , 2010; Fournier <i>et al.</i> , 2006 | –                     |
| ADC-12               | CAK95249                 | AM283529           | <i>A. pittii</i>                | –                                            | Beceiro <i>et al.</i> , 2009                                           | –                     |
| ADC-13               | CAK95248                 | AM283528           | <i>A. pittii</i>                | –                                            | Beceiro <i>et al.</i> , 2009                                           | –                     |
| ADC-14               | CAK95247                 | AM283527           | <i>A. pittii</i>                | –                                            | Beceiro <i>et al.</i> , 2009                                           | –                     |
| ADC-15               | CAK95246                 | AM283526           | <i>A. pittii</i>                | –                                            | Beceiro <i>et al.</i> , 2009                                           | –                     |
| ADC-16               | CAK95245                 | AM283525           | <i>A. pittii</i>                | –                                            | Beceiro <i>et al.</i> , 2009                                           | –                     |
| ADC-17               | CAK95244                 | AM283524           | <i>A. pittii</i>                | –                                            | Beceiro <i>et al.</i> , 2009                                           | –                     |
| ADC-18               | CAK95243                 | AM283523           | <i>A. pittii</i>                | WP_002118772                                 | Beceiro <i>et al.</i> , 2009                                           | –                     |
| ADC-19               | CAK95242                 | AM283522           | <i>A. pittii</i>                | –                                            | Beceiro <i>et al.</i> , 2009                                           | –                     |
| ADC-20               | CAK95241                 | AM283521           | <i>A. pittii</i>                | –                                            | Beceiro <i>et al.</i> , 2009                                           | –                     |
| ADC-21               | CAK95240                 | AM283520           | <i>A. pittii</i>                | –                                            | Beceiro <i>et al.</i> , 2009                                           | –                     |
| ADC-22               | CAK95239                 | AM283519           | <i>A. pittii</i>                | –                                            | Beceiro <i>et al.</i> , 2009                                           | –                     |
| ADC-23               | CAK95238                 | AM283518           | <i>A. pittii</i>                | –                                            | Beceiro <i>et al.</i> , 2009                                           | –                     |
| ADC-24               | CAK95237                 | AM283517           | <i>A. pittii</i>                | –                                            | Beceiro & Bou., not published                                          | ADC-19                |
| ADC-25               | ABK34773                 | EF016355           | <i>A. baumannii</i>             | WP_001211217                                 | Zong <i>et al.</i> , 2008                                              | ADC-NIPH 528          |
| ADC-26               | ADG46043                 | GU591987           | <i>A. baumannii</i>             | WP_001211238                                 | Rodriguez-Martinez <i>et al.</i> , 2010                                | ADC-NIPH 146          |
| ADC-29               | ACC66195                 | EU604835           | <i>A. baumannii</i>             | –                                            | Chiu <i>et al.</i> , not published                                     | –                     |
| ADC-30               | ADG46041                 | GU591985           | <i>A. baumannii</i>             | WP_001211218                                 | Rodriguez-Martinez <i>et al.</i> , 2010                                | ADC-NIPH 2061         |
| ADC-38               | ACC95873                 | EU652243           | <i>A. baumannii</i>             | –                                            | Bogaerts <i>et al.</i> 2008                                            | –                     |
| ADC-39               | ACC95874                 | EU652244           | <i>A. baumannii</i>             | –                                            | Bogaerts <i>et al.</i> 2008                                            | –                     |
| ADC-41               | ACN62070                 | FJ744160           | <i>A. pittii</i>                | –                                            | Huang <i>et al.</i> , 2010                                             | –                     |
| ADC-42               | ACN62071                 | FJ744161           | <i>A. pittii</i>                | –                                            | Huang <i>et al.</i> , 2010                                             | –                     |
| ADC-43               | ACN62072                 | FJ744162           | <i>A. pittii</i>                | WP_032055358                                 | Huang <i>et al.</i> , 2010                                             | –                     |
| ADC-44               | ACN62073                 | FJ744163           | <i>A. pittii</i>                | –                                            | Huang <i>et al.</i> , 2010                                             | –                     |
| ADC-50               | ADG46038                 | GU591982           | <i>A. baumannii</i>             | WP_031965243                                 | Rodriguez-Martinez <i>et al.</i> , not published                       | –                     |
| ADC-51               | ADG46040                 | GU591984           | <i>A. baumannii</i>             | –                                            | Rodriguez-Martinez <i>et al.</i> , 2010                                | –                     |
| ADC-52               | ADG46042                 | GU591986           | <i>A. baumannii</i>             | WP_001211232                                 | Rodriguez-Martinez <i>et al.</i> , 2010                                | –                     |
| ADC-53               | ADG46044                 | GU591988           | <i>A. baumannii</i>             | –                                            | Rodriguez-Martinez <i>et al.</i> , 2010                                | –                     |
| ADC-54               | ADK35761                 | HM437231           | <i>A. baumannii</i>             | –                                            | Bogaerts <i>et al.</i> , 2010                                          | –                     |

**TABLE S6. CONT.** Numeration of the GenBank variants of *bla*<sub>ADC</sub>.

| Variant <sup>a</sup> | GenBank accession number |                 | Species of first identification    | NCBI reference sequence, length <sup>b</sup> | Reference <sup>c</sup>                                            | Previous designations      |
|----------------------|--------------------------|-----------------|------------------------------------|----------------------------------------------|-------------------------------------------------------------------|----------------------------|
|                      | Protein                  | Nucleotide      |                                    |                                              |                                                                   |                            |
| ADC-56               | AEL30570                 | JF265067        | <i>A. baumannii</i>                | WP_031973850                                 | Tian <i>et al.</i> , 2011                                         | –                          |
| ADC-57               | ADO51072                 | HQ258925        | <i>A. baumannii</i>                | WP_001211226                                 | Revathi <i>et al.</i> , 2013                                      | –                          |
| ADC-58               | AFG25594                 | JQ319653        | <i>A. baumannii</i>                | –                                            | Zhang, not published                                              | –                          |
| ADC-59               | AFG25595                 | JQ319654        | <i>A. baumannii</i>                | –                                            | Zhang, not published                                              | –                          |
| ADC-60               | AFH53180                 | JQ692087        | <i>A. baumannii</i>                | –                                            | Huang, not published                                              | –                          |
| ADC-61               | AFI56570                 | JQ753702        | <i>A. baumannii</i>                | WP_033503051                                 | Zhou, not published                                               | –                          |
| ADC-62               | AFK24475                 | JQ867374        | <i>A. baumannii</i>                | –                                            | Wang, not published                                               | –                          |
| ADC-63               | AFM80040                 | JQ911781        | <i>A. baumannii</i>                | –                                            | Zhang, not published                                              | –                          |
| ADC-64               | AFM80041                 | JQ911782        | <i>A. baumannii</i>                | –                                            | Zhang, not published                                              | –                          |
| ADC-65               | AFP73417                 | JX109941        | <i>A. baumannii</i>                | 385 amino acid                               | Ling <i>et al.</i> , 2013                                         | –                          |
| ADC-66               | AFP73418                 | JX109942        | <i>A. baumannii</i>                | –                                            | Ling <i>et al.</i> , 2013                                         | –                          |
| ADC-67               | AFP89364                 | JX169789        | <i>A. baumannii</i>                | –                                            | Xiao-min <i>et al.</i> , 2014                                     | ADC-57 (AEZ36052)          |
| ADC-68               | AGL39360                 | KC866352        | <i>A. baumannii</i>                | –                                            | Lee <i>et al.</i> , 2014 (as a poster); Jeon <i>et al.</i> , 2014 | –                          |
| ADC-72               | AIL90389                 | KJ885607        | <i>Acinetobacter calcoaceticus</i> | WP_017480710                                 | Sun <i>et al.</i> , 2014                                          | –                          |
| ADC-73               | ALA14808                 | KP881233        | <i>A. baumannii</i>                | WP_001211219                                 | This study (isolate A072)                                         | –                          |
| ADC-74               | ALA14809                 | KP881234        | <i>A. baumannii</i>                | WP_001211203                                 | This study (isolate A074)                                         | –                          |
| ADC-75               | ALA14810                 | KP881235        | <i>A. baumannii</i>                | –                                            | This study (isolate A076)                                         | –                          |
| ADC-76               | ALA14811                 | KP881236        | <i>A. baumannii</i>                | WP_001211237                                 | This study (isolate A078, intrinsic)                              | ADC-NIPH 335               |
| ADC-77               | ALA14812                 | KP881237        | <i>A. baumannii</i>                | –                                            | This study (isolate A078, acquired)                               | –                          |
| ADC-78               | ALA14813                 | KP881238        | <i>A. baumannii</i>                | WP_057691006                                 | This study (isolate A082)                                         | –                          |
| ADC-79               | ALA14814                 | KP881239        | <i>A. baumannii</i>                | WP_001159760                                 | This study (isolate A085)                                         | –                          |
| ADC-80               | ALA14815                 | KP881240        | <i>A. baumannii</i>                | WP_029424536                                 | This study (isolate A099)                                         | –                          |
| ADC-81               | ALA14816                 | KP881241        | <i>A. baumannii</i>                | 388 amino acid                               | This study (isolate A100)                                         | –                          |
| ADC-82               | AAV32519                 | AY758396        | <i>A. baumannii</i>                | –                                            | Heritier <i>et al.</i> , 2006                                     | –                          |
| ADC-83               | ABO38124                 | EF433777        | <i>A. baumannii</i>                | –                                            | Huang <i>et al.</i> , 2007 unpublished                            | –                          |
| ADC-84               | ABV21800                 | EU118261        | <i>A. baumannii</i>                | WP_001211220, 384 amino acid                 | Bratu <i>et al.</i> , 2008                                        | –                          |
| ADC-85               | ABV21801                 | EU118262        | <i>A. baumannii</i>                | –                                            | Bratu <i>et al.</i> , 2008                                        | –                          |
| ADC-86               | ABV21802                 | EU118263        | <i>A. baumannii</i>                | –                                            | Bratu <i>et al.</i> , 2008                                        | –                          |
| ADC-87               | ETY67158                 | AZNQ01000099    | <i>A. baumannii</i>                | 384 amino acid                               | Dent <i>et al.</i> , 2010                                         | –                          |
| ADC-88               | ADX04315                 | CP001921        | <i>A. baumannii</i>                | WP_001211223                                 | Park <i>et al.</i> , 2011                                         | –                          |
| ADC-89               | AFU38919                 | CP003856        | <i>A. baumannii</i>                | –                                            | Liou <i>et al.</i> , 2012                                         | –                          |
| ADC-90               | WP_017816757             | NZ_AOLU01000048 | <i>A. baumannii</i>                | WP_017816757                                 | Ho <i>et al.</i> , 2013                                           | –                          |
| ADC-91               | ELW88222                 | AMGA01000054    | <i>A. baumannii</i>                | WP_002157727                                 | Harkins <i>et al.</i> , 2013 unpublished                          | –                          |
| ADC-92               | ENW75976                 | APRG01000011    | <i>A. baumannii</i>                | WP_001211227                                 | Perichon <i>et al.</i> , 2014                                     | ADC-CIP 70–34 <sup>T</sup> |
| ADC-93               | ENU51112                 | APOQ01000006    | <i>A. baumannii</i>                | WP_004712857                                 | Perichon <i>et al.</i> , 2014                                     | ADC-NIPH 1669              |

**TABLE S6. CONT.** Numeration of the GenBank variants of *bla*<sub>ADC</sub>.

| Variant <sup>a</sup> | GenBank accession number |                 | Species of first identification                 | NCBI reference sequence, length <sup>b</sup> | Reference <sup>c</sup>                 | Previous designations      |
|----------------------|--------------------------|-----------------|-------------------------------------------------|----------------------------------------------|----------------------------------------|----------------------------|
|                      | Protein                  | Nucleotide      |                                                 |                                              |                                        |                            |
| ADC-94               | ENV26641                 | APPL01000015    | <i>A. baumannii</i>                             | WP_002126587                                 | Perichon <i>et al.</i> , 2014          | ADC-NIPH 190               |
| ADC-95               | ENW36647                 | APQV01000007    | <i>A. baumannii</i>                             | WP_005109685                                 | Perichon <i>et al.</i> , 2014          | ADC-NIPH 201               |
| ADC-96               | ENW46489                 | APQY01000003    | <i>A. baumannii</i>                             | WP_005123276                                 | Perichon <i>et al.</i> , 2014          | ADC-NIPH 329               |
| ADC-97               | ENV30802                 | APPM01000011    | <i>A. baumannii</i>                             | WP_004840559                                 | Perichon <i>et al.</i> , 2014          | ADC-NIPH 60                |
| ADC-98               | ENW51893                 | APQZ01000007    | <i>A. baumannii</i>                             | WP_005128228                                 | Perichon <i>et al.</i> , 2014          | ADC-NIPH 601               |
| ADC-99               | ENU68675                 | APOV01000029    | <i>A. baumannii</i>                             | WP_004739487                                 | Perichon <i>et al.</i> , 2014          | ADC-NIPH 615               |
| ADC-100              | ENW51227                 | APRA01000004    | <i>A. baumannii</i>                             | WP_005131186                                 | Perichon <i>et al.</i> , 2014          | ADC-NIPH 67                |
| ADC-101              | ENW72863                 | APRE01000031    | <i>A. baumannii</i>                             | WP_005138362                                 | Perichon <i>et al.</i> , 2014          | ADC-NIPH 80                |
| ADC-102              | ENW00696                 | APQI01000003    | <i>A. calcoaceticus</i>                         | WP_005046018                                 | Perichon <i>et al.</i> , 2014          | ADC-CIP 81–8 <sup>T</sup>  |
| ADC-103              | ENU07956                 | APOE01000009    | <i>A. calcoaceticus</i>                         | WP_004643536                                 | Perichon <i>et al.</i> , 2014          | ADC-NIPH 13                |
| ADC-104              | ENV92309                 | APQH01000006    | <i>A. calcoaceticus</i>                         | WP_005039111                                 | Perichon <i>et al.</i> , 2014          | ADC-ANC 3680               |
| ADC-105              | ENV41121                 | APPP01000013    | <i>Acinetobacter nosocomialis</i>               | WP_004886093                                 | Perichon <i>et al.</i> , 2014          | ADC-NIPH 386               |
| ADC-106              | ENU48760                 | APOP01000002    | <i>A. nosocomialis</i>                          | WP_004707701                                 | Perichon <i>et al.</i> , 2014          | ADC-NIPH 2119 <sup>T</sup> |
| ADC-107              | ENW11417                 | APQN01000012    | <i>A. pittii</i>                                | WP_005068074                                 | Perichon <i>et al.</i> , 2014          | ADC-ANC 3678               |
| ADC-108              | ENU43147                 | APOO01000021    | <i>Acinetobacter</i> gen. sp. “Close to 13TU”   | WP_004700205                                 | Perichon <i>et al.</i> , 2014          | ADC-NIPH 973               |
| ADC-109              | ENX43770                 | APSC01000009    | <i>Acinetobacter</i> gen. sp. “Between 1 and 3” | WP_005307218                                 | Perichon <i>et al.</i> , 2014          | ADC-NIPH 542               |
| ADC-110              | ENV03983                 | APPF01000018    | <i>Acinetobacter</i> gen. sp. “Between 1 and 3” | WP_004790939                                 | Perichon <i>et al.</i> , 2014          | ADC-NIPH 817               |
| ADC-111              | EOQ64883                 | APQJ01000005    | <i>A. calcoaceticus</i> -like                   | WP_016137488                                 | Perichon <i>et al.</i> , 2014          | ADC-ANC 3811               |
| ADC-112              | EOQ71234                 | APQM01000001    | <i>A. pittii</i> -like                          | WP_016140427                                 | Perichon <i>et al.</i> , 2014          | ADC-ANC 4050               |
| ADC-113              | EOQ73533                 | APQO01000006    | <i>A. pittii</i> -like                          | WP_016146025                                 | Perichon <i>et al.</i> , 2014          | ADC-ANC 4052               |
| ADC-114              | EXS60093                 | JFYI01000005    | <i>A. baumannii</i>                             | WP_032039838                                 | Harris <i>et al.</i> , unpublished     | –                          |
| ADC-115              | EYS55294                 | JHPF01000005    | <i>A. baumannii</i>                             | WP_001211209                                 | Harris <i>et al.</i> , unpublished     | –                          |
| ADC-116              | EXD64655                 | JEZV01000049    | <i>A. baumannii</i>                             | WP_032062810                                 | Harris <i>et al.</i> , unpublished     | –                          |
| ADC-117              | ETP95102                 | AYGO01000141    | <i>A. baumannii</i>                             | WP_031980335                                 | Wright <i>et al.</i> ,                 | –                          |
| ADC-118              | WP_033502167             | NZ_AGSU01000096 | <i>A. baumannii</i>                             | WP_033502167                                 | Liou <i>et al.</i> , unpublished       | –                          |
| ADC-119              | WP_001211214             | NZ_AMIJ01000141 | <i>A. baumannii</i>                             | WP_001211214                                 | Sahl <i>et al.</i> , unpublished       | –                          |
| ADC-120              | KHY08585                 | JWWE03000102    | <i>A. baumannii</i>                             | WP_039270258                                 | Adams <i>et al.</i> , unpublished      | –                          |
| ADC-121              | KHV30477                 | JWSI03000106    | <i>A. baumannii</i>                             | WP_039258389                                 | Adams <i>et al.</i> , 2015 unpublished | –                          |
| ADC-122              | KJC71195                 | JZCF01000044    | <i>A. baumannii</i>                             | WP_044718369                                 | Adams <i>et al.</i> , 2015 unpublished | –                          |

**TABLE S6. CONT.** Numeration of the GenBank variants of *bla*<sub>ADC</sub>.

| Variant <sup>a</sup> | GenBank accession number |                 | Species of first identification         | NCBI reference sequence, length <sup>b</sup> | Reference <sup>c</sup>                  | Previous designations              |
|----------------------|--------------------------|-----------------|-----------------------------------------|----------------------------------------------|-----------------------------------------|------------------------------------|
|                      | Protein                  | Nucleotide      |                                         |                                              |                                         |                                    |
| ADC-401              | CAL25116                 | AM293332        | <i>Acinetobacter baylyi</i>             | WP_004923134, 397 amino acid                 | Beceiro <i>et al.</i> , 2007            | ADC-8, ADC-CIP 107474 <sup>T</sup> |
| ADC-501              | ENW07270                 | APQL01000005    | <i>Acinetobacter beijerinckii</i>       | WP_005060342, 395 amino acid                 | Perichon <i>et al.</i> , 2014           | ADC-CIP 110307 <sup>T</sup>        |
| ADC-502              | ENW06097                 | APQK01000009    | <i>A. beijerinckii</i>                  | WP_039909284, 395 amino acid                 | Perichon <i>et al.</i> , 2014           | ADC-ANC 3835                       |
| ADC-503              | ENW20454                 | APQQ01000012    | <i>Acinetobacter haemolyticus</i>       | WP_005087351, 395 amino acid                 | Perichon <i>et al.</i> , 2014           | ADC-CIP 64-3 <sup>T</sup>          |
| ADC-504              | ENW22241                 | APQR01000003    | <i>A. haemolyticus</i>                  | WP_005088798, 395 amino acid                 | Perichon <i>et al.</i> , 2014           | ADC-NIPH 261                       |
| ADC-505              | ENV65577                 | APPX01000035    | <i>Acinetobacter junii</i>              | WP_026057384, 397 amino acid                 | Perichon <i>et al.</i> , 2014           | ADC-CIP 64-5 <sup>T</sup>          |
| ADC-506              | ENV51174                 | APPS01000043    | <i>A. junii</i>                         | WP_042106493, 395 amino acid                 | Perichon <i>et al.</i> , 2014           | ADC-CIP 107470                     |
| ADC-507              | ENV64403                 | APPW01000004    | <i>A. junii</i>                         | WP_051067828, 395 amino acid                 | Perichon <i>et al.</i> , 2014           | ADC-NIPH 182                       |
| ADC-508              | ENV74627                 | APQA01000028    | <i>Acinetobacter ursingii</i>           | WP_004986092, 401 amino acid                 | Perichon <i>et al.</i> , 2014           | ADC-CIP 107286 <sup>T</sup>        |
| ADC-509              | ENV78143                 | APQC01000023    | <i>A. ursingii</i>                      | WP_005005518, 401 amino acid                 | Perichon <i>et al.</i> , 2014           | ADC-ANC 3649                       |
| ADC-510              | ENX45677                 | APQB01000030    | <i>A. ursingii</i>                      | WP_004999532, 401 amino acid                 | Perichon <i>et al.</i> , 2014           | ADC-NIPH 706                       |
| ADC-511              | ENV38300                 | APPO01000008    | <i>Acinetobacter venetianus</i>         | WP_004878176, 392 amino acid                 | Perichon <i>et al.</i> , 2014           | ADC-CIP 110063 <sup>T</sup>        |
| ADC-512              | ENU28809                 | APOK01000047    | <i>Acinetobacter</i> gen. sp. 6         | WP_004673603, 395 amino acid                 | Perichon <i>et al.</i> , 2014           | ADC-CIP A165                       |
| ADC-513              | ENW97918                 | APRM01000005    | <i>Acinetobacter</i> gen. sp. 6         | WP_005194146, 395 amino acid                 | Perichon <i>et al.</i> , 2014           | ADC-NIPH 298                       |
| ADC-514              | ENX35907                 | APRZ01000007    | <i>Acinetobacter</i> gen. sp. 13BJ/14TU | WP_032878960, 395 amino acid                 | Perichon <i>et al.</i> , 2014           | ADC-NIPH 1859                      |
| ADC-515              | ENX18440                 | APRT01000003    | <i>Acinetobacter</i> gen. sp. 13BJ/14TU | WP_026040157, 395 amino acid                 | Perichon <i>et al.</i> , 2014           | ADC-CIP 64-2                       |
| ADC-516              | ENX09334                 | APRR01000006    | <i>Acinetobacter</i> gen. sp. 14BJ      | WP_005228083, 395 amino acid                 | Perichon <i>et al.</i> , 2014           | ADC-NIPH 1847                      |
| ADC-517              | ENX39917                 | APSA01000003    | <i>Acinetobacter</i> gen. sp. 14BJ      | WP_005282242, 395 amino acid                 | Perichon <i>et al.</i> , 2014           | ADC-NIPH 3623 (corrected)          |
| ADC-518              | ENX56225                 | APSD01000035    | <i>Acinetobacter</i> gen. sp. 16        | WP_005317155, 395 amino acid                 | Perichon <i>et al.</i> , 2014           | ADC-ANC 3880                       |
| ADC-519              | ENV10055                 | APPH01000006    | <i>Acinetobacter</i> gen. sp. 16        | WP_004803441, 395 amino acid                 | Perichon <i>et al.</i> , 2014           | ADC-CIP 56-2                       |
| ADC-520              | ENX60630                 | APRN01000033    | <i>Acinetobacter</i> gen. sp. 16        | WP_005201690, 395 amino acid                 | Perichon <i>et al.</i> , 2014           | ADC-CIP 70-18                      |
| ADC-521              | ENW94247                 | APRL01000010    | <i>Acinetobacter</i> gen. sp. 17        | WP_005186110, 395 amino acid                 | Perichon <i>et al.</i> , 2014           | ADC-ANC 4105                       |
| ADC-522              | ENX53738                 | APRO01000007    | <i>Acinetobacter</i> gen. sp. 17        | WP_005209612, 395 amino acid                 | Perichon <i>et al.</i> , 2014           | ADC-NIPH 1867                      |
| ADC-523              | ENW98345                 | APRP01000033    | <i>Acinetobacter</i> Taxon 18           | WP_005219147, 388 amino acid                 | Perichon <i>et al.</i> , 2014           | ADC-ANC 3862                       |
| ADC-524              | ENU27798                 | APOJ01000016    | <i>Acinetobacter</i> Taxon 18           | WP_004659736, 388 amino acid                 | Perichon <i>et al.</i> , 2014           | ADC-NIPH 236                       |
| ADC-525              | WP_050041209             | NZ_LACJ01000004 | <i>Acinetobacter parvus</i>             | WP_050041209, 388 amino acid                 | Pedron <i>et al.</i> , 2015 unpublished | -                                  |

**TABLE S6. CONT.** Numeration of the GenBank variants of *bla*<sub>ADC</sub>.

| Variant <sup>a</sup> | GenBank accession number |              | Species of first identification    | NCBI reference sequence, length <sup>b</sup> | Reference <sup>c</sup>                     | Previous designations      |
|----------------------|--------------------------|--------------|------------------------------------|----------------------------------------------|--------------------------------------------|----------------------------|
|                      | Protein                  | Nucleotide   |                                    |                                              |                                            |                            |
| ADC-526              | ESK55746                 | AYEV01000014 | <i>Acinetobacter tjernbergiae</i>  | WP_023274629, 388 amino acid                 | Cerqueira <i>et al.</i> , 2013 unpublished | –                          |
| ADC-527              | ENU21567                 | APOI01000030 | <i>Acinetobacter</i> Taxon 19      | WP_004656962, 395 amino acid                 | Perichon <i>et al.</i> , 2014              | ADC-NIPH 809               |
| ADC-528              | ENU93346                 | APPC01000015 | <i>Acinetobacter</i> Taxon 20      | WP_004776385, 395 amino acid                 | Perichon <i>et al.</i> , 2014              | ADC-NIPH 758               |
| ADC-529              | ENX19523                 | APRW01000016 | <i>Acinetobacter</i> Taxon 20      | WP_005260284, 395 amino acid                 | Perichon <i>et al.</i> , 2014              | ADC-NIPH 2168              |
| ADC-530              | ENW83258                 | APRH01000012 | <i>Acinetobacter</i> Taxon 21      | WP_005147866, 395 amino acid                 | Perichon <i>et al.</i> , 2014              | ADC-ANC 3929 (corrected)   |
| ADC-531              | ENX38460                 | APSB01000022 | <i>Acinetobacter</i> Taxon 22      | WP_005297698, 395 amino acid                 | Perichon <i>et al.</i> , 2014              | ADC-NIPH 2100              |
| ADC-601              | ENV90446                 | APQG01000050 | <i>Acinetobacter bereziniae</i>    | WP_005034629, 390 amino acid                 | Perichon <i>et al.</i> , 2014              | ADC-CIP 70–12 <sup>T</sup> |
| ADC-602              | ENV20683                 | APPK01000046 | <i>A. bereziniae</i>               | WP_004832033, 390 amino acid                 | Perichon <i>et al.</i> , 2014              | ADC-NIPH 3                 |
| ADC-603              | ENU57495                 | APOS01000032 | <i>Acinetobacter guillouiae</i>    | WP_004723463, 391 amino acid                 | Perichon <i>et al.</i> , 2014              | ADC-CIP 63–46 <sup>T</sup> |
| ADC-604              | ENV14942                 | APPJ01000016 | <i>A. guillouiae</i>               | WP_004823669, 391 amino acid                 | Perichon <i>et al.</i> , 2014              | ADC-NIPH 991               |
| ADC-701              | ENV73166                 | APPZ01000007 | <i>Acinetobacter johnsonii</i>     | WP_004983048, 388 amino acid                 | Perichon <i>et al.</i> , 2014              | ADC-ANC 3681               |
| ADC-702              | ENU99039                 | APPE01000056 | <i>Acinetobacter</i> gen. sp. 15TU | WP_004783170, 386 amino acid                 | Perichon <i>et al.</i> , 2014              | ADC-NIPH 899               |
| ADC-703              | ENU21210                 | APOH01000008 | <i>Acinetobacter</i> Taxon 26      | WP_004650432, 388 amino acid                 | Perichon <i>et al.</i> , 2014              | ADC-ANC 3994               |

<sup>a</sup> The variants were divided into 5 groups according to the similarities (>69%) among their amino acid sequences. Numeration started at 1 (first group), 401 (second group), 501 (third group), 601 (fourth group), and 701 (fifth group).

<sup>b</sup> If not stated, the length is 383 amino acid.

<sup>c</sup> The list of references for this table is presented below:

**Bou, G., and J. Martinez-Beltran.** 2000. Cloning, nucleotide sequencing, and analysis of the gene encoding an AmpC  $\beta$ -lactamase in *Acinetobacter baumannii*. *Antimicrob. Agents Chemother.* 44:428–32.

**Mammeri, H., L. Poirel, N. Mangeney, and P. Nordmann.** 2003. Chromosomal integration of a cephalosporinase gene from *Acinetobacter baumannii* into *Oligella urethralis* as a source of acquired resistance to  $\beta$ -lactams. *Antimicrob. Agents Chemother.* 47:1536–42.

**Beceiro, A., L. Dominguez, A. Ribera, J. Vila, F. Molina, R. Villanueva, J. M. Eiros, and G. Bou.** 2004. Molecular characterization of the gene encoding a new AmpC  $\beta$ -lactamase in a clinical strain of *Acinetobacter* genomic species 3. *Antimicrob. Agents Chemother.* 48:1374–8.

**Segal, H., E. C. Nelson, and B. Gay Elisha.** 2004. Genetic environment and transcription of *ampC* in an *Acinetobacter baumannii* clinical isolate. *Antimicrob. Agents Chemother.* 48:612–4.

**Hujer, K. M., N. S. Hamza, A. M. Hujer, F. Perez, M. S. Helfand, C. R. Bethel, J. M. Thomson, V. E. Anderson, M. Barlow, L. B. Rice, F. C. Tenover, and R. A. Bonomo.** 2005. Identification of a new allelic variant of the *Acinetobacter baumannii* cephalosporinase, ADC-7  $\beta$ -lactamase: defining a unique family of class C enzymes. *Antimicrob. Agents Chemother.* 49:2941–8.

**Beceiro A, Perez-Llarena FJ, Perez A, Tomas Mdel M, Fernandez A, et al.** 2007. Molecular characterization of the gene encoding a new AmpC beta-lactamase in *Acinetobacter baylyi*. *J Antimicrob Chemother* 59: 996–1000.

- Rodríguez-Martínez JM, Poirel L, Nordmann P.** 2010. Genetic and functional variability of AmpC-type  $\beta$ -lactamases from *Acinetobacter baumannii*. *Antimicrob. Agents Chemother.* 54:4930–3.
- Fournier PE, Vallenet D, Barbe V, Audic S, Ogata H, Poirel L, Richet H, Robert C, Mangenot S, Abergel C, Nordmann P, Weissenbach J, Raoult D, Claverie JM.** 2006. Comparative genomics of multidrug resistance in *Acinetobacter baumannii*. *PLoS Genet.* 2:e7.
- Beceiro A, Perez A, Fernandez-Cuenca F, Martínez-Martínez L, Pascual A, Vila J et al.** 2009. Genetic variability among *ampC* genes from *Acinetobacter* genomic species 3. *Antimicrob Agents Chemother.* 53: 1177–84.
- Zong Z, Lu X, Valenzuela JK, Partridge SR, and Iredell J.** 2008. An outbreak of carbapenem-resistant *Acinetobacter baumannii* producing OXA-23 carbapenemase in western China. *Int J Antimicrob Agents.* 31:50–4.
- Bogaerts, P., G. Cuzon, T. Naas, C. Bauraing, A. Deplano, B. Lisssoir, P. Nordmann, and Y. Glupczynski.** 2008. Carbapenem-resistant *Acinetobacter baumannii* isolates expressing the *bla*<sub>OXA-23</sub> gene associated with *ISAb4* in Belgium. *Antimicrob. Agents Chemother.* 52:4205–6.
- Huang LY, Lu PL, Chen TL, Chang FY, Fung CP, Siu LK.** 2010. Molecular characterization of  $\beta$ -lactamase genes and their genetic structures in *Acinetobacter* genospecies 3 isolates in Taiwan. *Antimicrob Agents Chemother* 54:2699-703.
- Bogaerts P, Naas T, El Garch F, Cuzon G, Deplano A, Delaire T, et al.** 2010. GES extended-spectrum beta-lactamases in *Acinetobacter baumannii* isolates in Belgium. *Antimicrob Agents Chemother.* 54(11):4872–8.
- Tian GB, Adams-Haduch JM, Taracila M, Bonomo RA, Wang HN, Doi Y.** 2011. Extended-spectrum AmpC cephalosporinase in *Acinetobacter baumannii*: ADC-56 confers resistance to cefepime. *Antimicrob. Agents Chemother.* 55:4922–5.
- Zhou Y, Teng SJ, Yang L, Li SB, Xu Y.** 2015. A novel variant of the  $\beta$ -lactamase ADC-61 gene in multi-drug resistant *Acinetobacter baumannii*. *Genet Mol Res* 14:7092–100.
- Ling Yue-Ming, Lan Xiao-peng, and Wang Jian-fu.** 2013. Emergence of novel variants of  $\beta$ -lactamase gene *bla*<sub>ADC-65</sub> and *bla*<sub>ADC-66</sub> in pandrug-resistant *Acinetobacter baumannii*. *Chinese Journal of Antibiotics* 2:155-8 (article in Chinese).
- Xiao-Min X, You-Fen F, Wei-Yun F, Zu-Huang M, Xing-Bei W.** 2014. Antibiotic resistance determinants of a group of multidrug-resistant *Acinetobacter baumannii* in China. *J Antibiot (Tokyo)* 67(6):439-44.
- J. H. Jeon, M.-K. Hong, J. H. Lee, J. J. Lee, K. S. Park, A. M. Karim, J. Y. Jo, J. H. Kim, K. S. Ko, L.-W. Kang and S. H. Lee.** 2014. Structure of ADC-68, a novel carbapenem-hydrolyzing class C extended-spectrum  $\beta$ -lactamase isolated from *Acinetobacter baumannii*. *Acta Cryst D*70:2924–36.
- Sun, Y., Liu, Q., Chen, S., Song, Y., Liu, J., Guo, X., Zhu, L., Ji, X., Xu, L., Zhou, W., Qian, J., Feng, S.** 2014. Characterization and plasmid elimination of NDM-1-producing *Acinetobacter calcoaceticus* from China. *PLoS ONE*, 9:e106555.
- Revathi G, Siu LK, Lu PL, Huang LY.** 2013. First report of NDM-1-producing *Acinetobacter baumannii* in East Africa. *Int J Infect Dis* 17:e1255–e1258.
- Heritier C., Poirel L., Nordmann P.** 2006. Cephalosporinase over-expression resulting from insertion of *ISAb1* in *Acinetobacter baumannii*. *Clin. Microbiol. Infect.* 12:123–130.
- Bratu S, Landman D, Martin DA, Georgescu C, Quale J.** 2008. Correlation of antimicrobial resistance with beta-lactamases, the OmpA-like porin, and efflux pumps in clinical isolates of *Acinetobacter baumannii* endemic to New York City. *Antimicrob Agents Chemother* 52:2999–3005.
- Dent LL, Marshall DR, Pratap S, Hulette RB.** 2010. Multidrug resistant *Acinetobacter baumannii*: a descriptive study in a city hospital. *BMC Infect Dis.* 10:196.
- Park JY, Kim S, Kim SM, Cha SH, Lim SK, and Kim J.** 2011. Complete genome sequence of multidrug-resistant *Acinetobacter baumannii* strain 1656-2, which forms sturdy biofilm. *J Bacteriol.* 193:6393–4.
- Liou ML, Liu CC, Lu CW, Hsieh MF, Chang KC, Kuo HY, Lee CC, Chang CT, Yang CY, Tang CY.** 2012. Genome sequence of *Acinetobacter baumannii* TYTH-1. *J Bacteriol.* 194:6974.
- Ho AYM, Chow K-H, Law PYT, Tse H, Ho P-L.** 2013. Draft genome sequences of two multidrug-resistant *Acinetobacter baumannii* strains of sequence type ST92 and ST96. *Genome Announcements.* 1(3):e00296-13.

**Périchon B, Goussard S, Walewski V, Krizova L, Cerqueira G, Murphy C, et al.** 2014. Identification of 50 class D  $\beta$ -lactamases and 65 *Acinetobacter*-derived cephalosporinases in *Acinetobacter* spp. *Antimicrob Agents Chemother.* 58(2):936–49.

**Wright MS, Haft DH, Harkins DM, Perez F, Hujer KM, Bajaksouzian S, Benard MF, Jacobs MR, Bonomo RA, Adams MD.** 2014. New insights into dissemination and variation of the health care-associated pathogen *Acinetobacter baumannii* from genomic analysis. *mBio* 5:e00963-13.



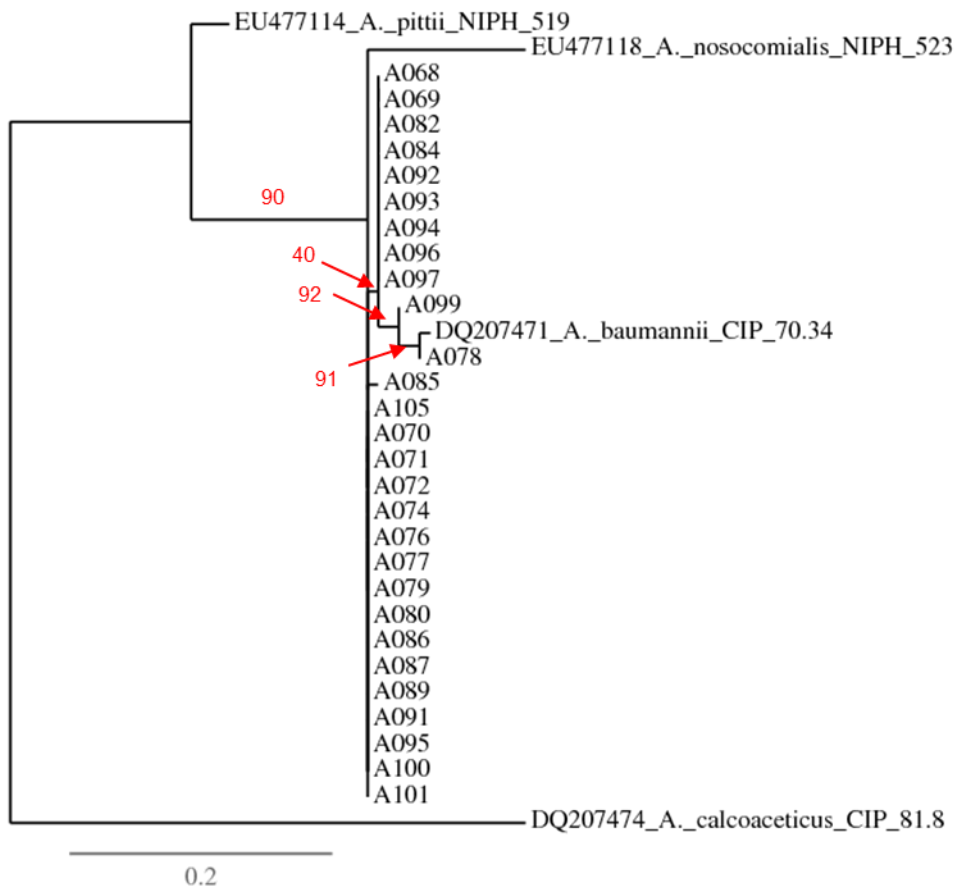

**FIGURE S1.** Species identification of the isolates using partial *rpoB* sequence analysis. The phylogenetic tree was constructed based on pairwise nucleotide sequence alignments of 352 bp of the *rpoB* gene of 28 clinical isolates of *Acinetobacter baumannii*, in comparison to the corresponding sequences of the *Acinetobacter calcoaceticus* CIP 81.8 (DQ207474), *Acinetobacter pittii* NIPH 519 (EU477114), *Acinetobacter nosocomialis* NIPH 523 (EU477118), and *A. baumannii* CIP 70.34 (DQ207471) reference strains. MUSCLE, Gblocks, PhyML, and TreeDyn were used for nucleotide alignment and tree construction. One hundred bootstraps were used for bootstrap analysis. Branch support values were highlighted in red and displayed in %.

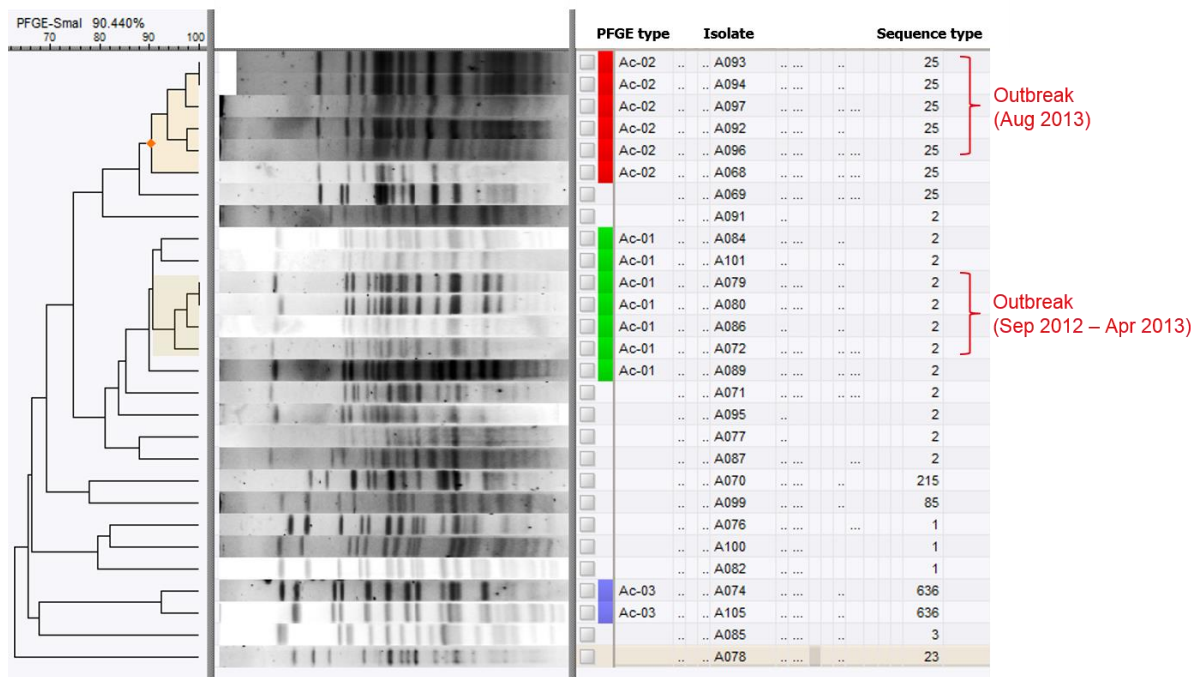

**FIGURE S2.** Molecular epidemiology of the isolates using pulsed field gel electrophoresis (PFGE). PFGE was performed on the *ApaI*-digested genomic DNA obtained from 28 clinical isolates of *Acinetobacter baumannii*. A dendrogram was generated using the BioNumerics software (version 7.1) based on similarities among the patterns calculated by the Dice coefficient method. A PFGE type was defined by a cluster of isolates showing  $\geq 90\%$  similarity or less than 3 band differences. A column of the corresponding sequence types of the isolates was added for comparison. Red right braces were used to highlight the isolates involved in outbreaks of infections.





```

A076 ATGTCACCAACTTATCAGTGA TAAGAA TCCGGGGTTCGA TCGACAGCGAGGCTG
A082 ATGTCACCAACTTATCAGTGA TAAGAA TCCGGGGTTCGA TCGACAGCGAGGCTG
A099 ATGTCACCAACTTATCAGTGA TAAGAA TCCGGGGTTCGA TCGACAGCGAGGCTG
A100 ATGTCACCAACTTATCAGTGA TAAGAA TCCGGGGTTCGA TCGACAGCGAGGCTG
A085 ATGTCACCAACTTATCAGTGA TAAGAA TCCGGGGTTCGA TCGACAGCGAGGCTG
*****

A076 GTCCGGAGCCAGCGGTGAACCCACAGACCCCTGATGTAATCTGAGCACTGTCCGC
A082 GTCCGGAGCCAGCGGTGAACCCACAGACCCCTGATGTAATCTGAGCACTGTCCGC
A099 GTCCGGAGCCAGCGGTGAACCCACAGACCCCTGATGTAATCTGAGCACTGTCCGC
A100 GTCCGGAGCCAGCGGTGAACCCACAGACCCCTGATGTAATCTGAGCACTGTCCGC
A085 GTCCGGAGCCAGCGGTGAACCCACAGACCCCTGATGTAATCTGAGCACTGTCCGC
*****

A076 CTGAGCGCTGTGGCATCGCCGTGATTAATGCGGGTCTGCGGGGCTCTGCGGATCTG
A082 CTGAGCGCTGTGGCATCGCCGTGATTAATGCGGGTCTGCGGGGCTCTGCGGATCTG
A099 CTGAGCGCTGTGGCATCGCCGTGATTAATGCGGGTCTGCGGGGCTCTGCGGATCTG
A100 CTGAGCGCTGTGGCATCGCCGTGATTAATGCGGGTCTGCGGGGCTCTGCGGATCTG
A085 CTGAGCGCTGTGGCATCGCCGTGATTAATGCGGGTCTGCGGGGCTCTGCGGATCTG
*****

A076 GTTCACTCGAAGCAGCGTCAACCCACATAGGCAATTCGTCGGCGCTGTATGGGTTGATG
A082 GTTCACTCGAAGCAGCGTCAACCCACATAGGCAATTCGTCGGCGCTGTATGGGTTGATG
A099 GTTCACTCGAAGCAGCGTCAACCCACATAGGCAATTCGTCGGCGCTGTATGGGTTGATG
A100 GTTCACTCGAAGCAGCGTCAACCCACATAGGCAATTCGTCGGCGCTGTATGGGTTGATG
A085 GTTCACTCGAAGCAGCGTCAACCCACATAGGCAATTCGTCGGCGCTGTATGGGTTGATG
*****

A076 CAATTGCGCTGCGACCTGTGCTGGCGCGCTGTCCGATCGTTCGGCGCGCGCGCGCTC
A082 CAATTGCGCTGCGACCTGTGCTGGCGCGCTGTCCGATCGTTCGGCGCGCGCGCGCTC
A099 CAATTGCGCTGCGACCTGTGCTGGCGCGCTGTCCGATCGTTCGGCGCGCGCGCGCTC
A100 CAATTGCGCTGCGACCTGTGCTGGCGCGCTGTCCGATCGTTCGGCGCGCGCGCGCTC
A085 CAATTGCGCTGCGACCTGTGCTGGCGCGCTGTCCGATCGTTCGGCGCGCGCGCGCTC
*****

A076 TTGCTGTGCTGCGTGGCGCGCGCTGCTGTGATAGCCATCATGCGGAGCGCGCTTTC
A082 TTGCTGTGCTGCGTGGCGCGCGCTGCTGTGATAGCCATCATGCGGAGCGCGCTTTC
A099 TTGCTGTGCTGCGTGGCGCGCGCTGCTGTGATAGCCATCATGCGGAGCGCGCTTTC
A100 TTGCTGTGCTGCGTGGCGCGCGCTGCTGTGATAGCCATCATGCGGAGCGCGCTTTC
A085 TTGCTGTGCTGCGTGGCGCGCGCTGCTGTGATAGCCATCATGCGGAGCGCGCTTTC
*****

A076 CTTGGGTTCTCTATATCGCGCGGATCGTGGCGGCAATCCGGGGCGGACTGGGGCGGTA
A082 CTTGGGTTCTCTATATCGCGCGGATCGTGGCGGCAATCCGGGGCGGACTGGGGCGGTA
A099 CTTGGGTTCTCTATATCGCGCGGATCGTGGCGGCAATCCGGGGCGGACTGGGGCGGTA
A100 CTTGGGTTCTCTATATCGCGCGGATCGTGGCGGCAATCCGGGGCGGACTGGGGCGGTA
A085 CTTGGGTTCTCTATATCGCGCGGATCGTGGCGGCAATCCGGGGCGGACTGGGGCGGTA
*****

A076 GCGCGCGCTATATGCGGATATCACTGATGGCGATGAGCGCGCGCGCACTTCGGCTTC
A082 GCGCGCGCTATATGCGGATATCACTGATGGCGATGAGCGCGCGCGCACTTCGGCTTC
A099 GCGCGCGCTATATGCGGATATCACTGATGGCGATGAGCGCGCGCGCACTTCGGCTTC
A100 GCGCGCGCTATATGCGGATATCACTGATGGCGATGAGCGCGCGCGCACTTCGGCTTC
A085 GCGCGCGCTATATGCGGATATCACTGATGGCGATGAGCGCGCGCGCACTTCGGCTTC
*****

A076 ATGAGCGCGCTGTTCGGGTTCGGGATGATGCGGGGACCTGTGCTCGTGGGCTGATGGGC
A082 ATGAGCGCGCTGTTCGGGTTCGGGATGATGCGGGGACCTGTGCTCGTGGGCTGATGGGC
A099 ATGAGCGCGCTGTTCGGGTTCGGGATGATGCGGGGACCTGTGCTCGTGGGCTGATGGGC
A100 ATGAGCGCGCTGTTCGGGTTCGGGATGATGCGGGGACCTGTGCTCGTGGGCTGATGGGC
A085 ATGAGCGCGCTGTTCGGGTTCGGGATGATGCGGGGACCTGTGCTCGTGGGCTGATGGGC
*****

A076 GGTTCCTCCCCCAAGCTCGTTCCTGCGCGCGGAGCCCTTGAAAGCGCTCAATTTCTG
A082 GGTTCCTCCCCCAAGCTCGTTCCTGCGCGCGGAGCCCTTGAAAGCGCTCAATTTCTG
A099 GGTTCCTCCCCCAAGCTCGTTCCTGCGCGCGGAGCCCTTGAAAGCGCTCAATTTCTG
A100 GGTTCCTCCCCCAAGCTCGTTCCTGCGCGCGGAGCCCTTGAAAGCGCTCAATTTCTG
A085 GGTTCCTCCCCCAAGCTCGTTCCTGCGCGCGGAGCCCTTGAAAGCGCTCAATTTCTG
*****

A076 ACGGGCTGTTCCTTTTCCGGAGTGGCAAAAGGGGAAAGCGCGCGCTTACGCGGGAG
A082 ACGGGCTGTTCCTTTTCCGGAGTGGCAAAAGGGGAAAGCGCGCGCTTACGCGGGAG
A099 ACGGGCTGTTCCTTTTCCGGAGTGGCAAAAGGGGAAAGCGCGCGCTTACGCGGGAG
A100 ACGGGCTGTTCCTTTTCCGGAGTGGCAAAAGGGGAAAGCGCGCGCTTACGCGGGAG
A085 ACGGGCTGTTCCTTTTCCGGAGTGGCAAAAGGGGAAAGCGCGCGCTTACGCGGGAG
*****

A076 GCCTCTACCTTGTCTGTGCTGCGCGCGCTGGTCCGGGGCTTGGAGCGCGCGAGGCA
A082 GCCTCTACCTTGTCTGTGCTGCGCGCGCTGGTCCGGGGCTTGGAGCGCGCGAGGCA
A099 GCCTCTACCTTGTCTGTGCTGCGCGCGCTGGTCCGGGGCTTGGAGCGCGCGAGGCA
A100 GCCTCTACCTTGTCTGTGCTGCGCGCGCTGGTCCGGGGCTTGGAGCGCGCGAGGCA
A085 GCCTCTACCTTGTCTGTGCTGCGCGCGCTGGTCCGGGGCTTGGAGCGCGCGAGGCA
*****

A076 CGAGCGATCGCTGA
A082 CGAGCGATCGCTGA
A099 CGAGCGATCGCTGA
A100 CGAGCGATCGCTGA
A085 CGAGCGATCGCTGA
*****

```

**FIGURE S4.** Nucleotide sequence comparisons of the *tetA* genes. The alignment was performed using CLUSTALW (<http://www.genome.jp/tools-bin/clustalw>) of a region of 1275 bp representing the complete sequence of *tetA* identified in isolates A076, A082, A099, A100, and A105. Polymorphisms were highlighted in yellow.

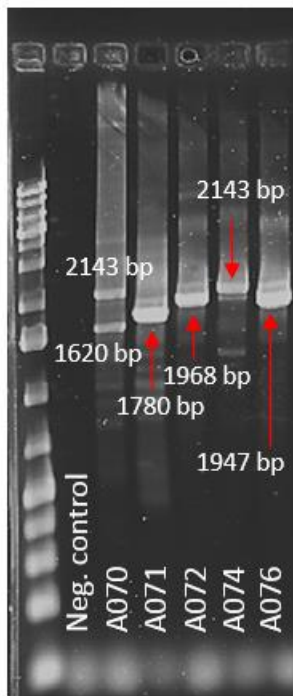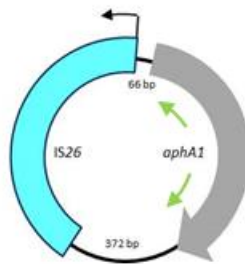

| Type and size (bp) of the assembly | Size of the corresponding circular form (bp) | Size of corresponding amplicon (bp) | Representative isolate |
|------------------------------------|----------------------------------------------|-------------------------------------|------------------------|
| Tn6020a-1 (2894)                   | 2074                                         | 1968                                | A072                   |
| Tn6020a-2 (3069)                   | 2249                                         | 2143 (the upper band in A070)       | A070 and A074          |
| Tn6020a-3 (2873)                   | 2053                                         | 1947                                | A076                   |
| Tn6020b-1 (2706)                   | 1886                                         | 1780                                | A071                   |
| Tn6020b-2 (2546)                   | 1726                                         | 1620 (the lower band in A070)       | A070                   |

**FIGURE S5.** Gel electrophoresis of amplicons generated by PCR71. The PCR assay (Table S1) was performed using two *aphA1b* internal outwards primers, shown as green arrows in the graphic map to the left. The size of bands corresponded to the size of Tn6020-derived circular forms and to the type and size of Tn6020 assemblies, as described in the table at the bottom.
